# Supplementary material for: A kinome siRNA screen identifies HGS as a potential target for liver cancers with oncogenic mutations in CTNNB1
Source: BMC Cancer. 2015 Dec 29;15:1020. doi: 10.1186/s12885-015-2037-8 (PMC4696130; doi:10.1186/s12885-015-2037-8)
Supplement: Additional file 7: Figure S5. — Validation of siRNA efficiency in HCT116 cells. HCT116WT/S45del cells were transfected with scramble siRNAs or with four different siRNAs designed to target HGS, STRADA, FES, BRAF or PKMYT1. Untransfected cells were also included as a control. Forty-eight hours after transfection, the mRNA levels of these genes were assessed by RTqPCR and normalized to the abundance of 18S RNA. (PDF 196 kb) [file 12885_2015_2037_MOESM7_ESM.pdf]

## Sheet: POOL_DATA
probeset_id	Gene.symbol	HuH6shCTNNB1	HuH6shCTNNB1_+dox	Delta_log2
8079021	CTNNB1	10.9563	10.0589	-0.8974
8017718	AXIN2	9.58805	8.33957	-1.24848
7979241	BMP4	8.99423	7.85262	-1.14161
7995525	NKD1	9.95744	8.82686	-1.13058
7968015	TNFRSF19	7.77545	6.65667	-1.11878
8019334	NOTUM	7.57768	6.47015	-1.10753
8061013	ISM1	9.18086	8.06913	-1.11173
7957140	LGR5	9.35647	8.32777	-1.0287
7965335	DUSP6	9.45958	8.44167	-1.01791
7942123	CCND1	11.3477	10.4144	-0.9333
7967993	FGF9	6.96889	6.13135	-0.83754
8148317	MYC	10.4593	9.79882	-0.66048
7995681	MMP2	7.50978	6.89466	-0.61512
7959234	HNF1A	7.5988	7.02113	-0.57767
7951040	GPR83	7.70558	5.92494	-1.78064
7923534	MYBPH	9.11849	7.46982	-1.64867
7915472	SLC2A1	11.8468	10.2209	-1.6259
7931556	VENTX	8.00055	6.46123	-1.53932
8076415	SNORD13P1	5.07535	3.54542	-1.52993
7947892	NA	5.44421	3.94019	-1.50402
8067140	CYP24A1	5.65739	4.15563	-1.50176
7908351	PLA2G4A	6.82013	5.36063	-1.4595
7960365	EFCAB4B	5.79091	4.35861	-1.4323
7920278	S100A3	5.73681	4.37102	-1.36579
7961418	NA	4.98103	3.62135	-1.35968
7948908	SNORD26	7.74467	6.39553	-1.34914
7904959	NA	6.50712	5.26265	-1.24447
7948906	SNORD27	6.26099	5.02188	-1.23911
8095456	ODAM	9.36125	8.12258	-1.23867
8149387	FAM86B1	8.30221	7.06952	-1.23269
7919560	NA	5.4985	4.26781	-1.23069
8132960	NA	6.22487	5.0104	-1.21447
7922408	SNORD78	6.73165	5.52879	-1.20286
8087790	RRP9	8.76839	7.58457	-1.18382
8022249	NA	5.4764	4.29772	-1.17868
8015016	TNS4	8.11132	6.93615	-1.17517
7957298	NAV3	7.58178	6.41425	-1.16753
7981215	NA	4.00886	2.84271	-1.16615
7970810	SLC7A1	8.21993	7.05888	-1.16105
8106528	NA	5.18801	4.0368	-1.15121
7909681	PROX1	8.11722	6.98042	-1.1368
8040843	CAD	8.78636	7.65055	-1.13581
8161238	RAB1C	6.41839	5.28346	-1.13493
7932985	NRP1	8.15851	7.02532	-1.13319
7904572	NA	5.37609	4.2438	-1.13229
7998666	SNORA64	5.49878	4.38116	-1.11762
7902400	SNORD45B	7.02672	5.91091	-1.11581
7938702	DKFZp686O24166	7.25387	6.14154	-1.11233
8037835	SLC1A5	9.89028	8.79309	-1.09719
7948898	SNORD31	6.80243	5.7078	-1.09463
7993664	CP110	6.87165	5.78337	-1.08828
7949603	BRMS1	8.14904	7.06313	-1.08591
8103951	ACSL1	7.76461	6.68652	-1.07809
7970569	SACS	7.80778	6.73707	-1.07071
8060432	TGM3	6.59834	5.53248	-1.06586
8030944	ZNF578	4.58125	3.52036	-1.06089
8112724	NA	4.84663	3.78657	-1.06006
8167006	RP2	8.64538	7.58541	-1.05997
8173979	NOX1	7.01305	5.96333	-1.04972
7899462	RCC1	9.9773	8.92977	-1.04753
7939265	NAT10	8.6648	7.61947	-1.04533
8115851	STC2	6.7764	5.73717	-1.03923
7965322	KITLG	10.2892	9.26144	-1.02776
7904364	WDR3	8.14073	7.11606	-1.02467
8052622	NA	9.42807	8.40413	-1.02394
7953012	WNT5B	7.12226	6.10313	-1.01913
7902398	SNORD45A	7.25587	6.2408	-1.01507
8130438	TFB1M	10.2766	9.2748	-1.0018
7996569	NA	4.61907	3.62047	-0.9986
8158544	METTL11A	9.73584	8.7373	-0.99854
8169240	PRPS1	9.03798	8.04346	-0.99452
8142061	PUS7	7.87023	6.88042	-0.98981
8132843	HAUS6	9.02835	8.04274	-0.98561
7990654	GOLGA6A	6.26612	5.28269	-0.98343
8119595	RPL7L1	7.07194	6.08993	-0.98201
8003859	NA	4.61579	3.63591	-0.97988
7910694	EDARADD	8.28054	7.30406	-0.97648
7921099	CRABP2	9.76204	8.78649	-0.97555
8060611	ITPA	9.90027	8.9253	-0.97497
7955869	HOXC8	8.35634	7.38264	-0.9737
8060949	ANKRD5	7.76634	6.79526	-0.97108
8030437	PRMT1	9.84578	8.8749	-0.97088
8029617	GEMIN7	7.23642	6.27131	-0.96511
7905054	NA	5.65161	4.69063	-0.96098
8008064	PNPO	8.79159	7.83124	-0.96035
7898693	ALPL	8.46212	7.50601	-0.95611
7929901	C10orf2	7.0198	6.06378	-0.95602
8165217	NOTCH1	6.40214	5.44821	-0.95393
7928189	UNC5B	8.03162	7.07807	-0.95355
7962375	PRICKLE1	8.27835	7.3259	-0.95245
7963313	GALNT6	8.1807	7.23489	-0.94581
8178070	LY6G6D	7.32444	6.37947	-0.94497
8179309	LY6G6D	7.32444	6.37947	-0.94497
8050255	NOL10	7.77053	6.82634	-0.94419
8044473	POLR1B	7.30114	6.36026	-0.94088
8020141	APCDD1	10.0253	9.08587	-0.93943
7963631	RARG	8.0141	7.07482	-0.93928
8019765	ARHGDIA	9.62412	8.68693	-0.93719
7975045	MTHFD1	9.52608	8.59116	-0.93492
8132642	PPIA	9.36737	8.43785	-0.92952
8051030	SLC5A6	9.20954	8.2801	-0.92944
7942527	POLD3	8.93828	8.01008	-0.9282
8011640	MYBBP1A	8.37355	7.44714	-0.92641
8030364	SNORD34	5.93605	5.0097	-0.92635
7922121	ANKRD36BP1	6.55336	5.63205	-0.92131
7919556	NA	5.35853	4.43793	-0.9206
8083494	MME	9.01036	8.09159	-0.91877
8008151	IGF2BP1	10.2903	9.37284	-0.91746
8169638	NA	3.78074	2.86437	-0.91637
8015806	ETV4	8.9179	8.00306	-0.91484
8016994	RNF43	9.54471	8.6307	-0.91401
7962479	NA	4.38417	3.47074	-0.91343
7942832	C11orf82	8.19971	7.2879	-0.91181
7991777	C4orf46	6.99582	6.08442	-0.9114
7910377	NA	6.88027	5.96954	-0.91073
8034783	LPHN1	7.54838	6.63998	-0.9084
7974916	NA	5.43428	4.52628	-0.908
8118242	LY6G6D	6.71325	5.80552	-0.90773
8004508	SNORA67	7.20664	6.29901	-0.90763
8038261	GYS1	8.37393	7.46808	-0.90585
8116818	BMP6	7.58214	6.67681	-0.90533
8058390	RAPH1	9.87069	8.96576	-0.90493
7997059	DDX19A	7.54735	6.64257	-0.90478
8033465	TIMM44	8.54755	7.64308	-0.90447
8100495	PPAT	8.8277	7.92632	-0.90138
7929858	FAM178A	8.70846	7.80837	-0.90009
7959312	TMEM120B	7.58535	6.68544	-0.89991
8014956	NR1D1	7.70533	6.80612	-0.89921
7985213	CHRNA5	5.98469	5.0863	-0.89839
7904480	NA	4.99772	4.10058	-0.89714
7904963	NA	4.99772	4.10058	-0.89714
8158627	NCS1	7.92039	7.02329	-0.8971
8008588	HLF	9.18868	8.29309	-0.89559
7996819	CDH3	7.57753	6.68476	-0.89277
7924758	LOC391169	6.4256	5.53735	-0.88825
7950906	CTSC	9.03127	8.14364	-0.88763
8093053	TFRC	9.88301	8.99611	-0.8869
8029854	SLC1A5	7.98831	7.10175	-0.88656
7964021	RNF41	8.37604	7.49445	-0.88159
8053496	POLR1A	8.31883	7.43771	-0.88112
7911359	NOC2L	9.2991	8.41831	-0.88079
8027323	ZNF257	5.99264	5.11301	-0.87963
8096077	NA	5.15917	4.28062	-0.87855
8073068	APOBEC3C	9.08454	8.20682	-0.87772
7948904	SNORD28	8.44518	7.56854	-0.87664
7992973	DNAJA3	9.31603	8.43983	-0.8762
8097058	CEP170P1	4.49526	3.62167	-0.87359
7925525	CEP170	7.11877	6.24664	-0.87213
8164907	REXO4	8.50601	7.6342	-0.87181
7897620	PGD	10.6298	9.75925	-0.87055
7963760	NFE2	6.53873	5.67086	-0.86787
8119088	CDKN1A	8.86762	8.00058	-0.86704
8072454	RNF185	7.26674	6.40019	-0.86655
8026155	NACC1	9.57765	8.71183	-0.86582
8070269	DSCR3	8.64577	7.78004	-0.86573
8113278	LIX1	5.44	4.5747	-0.8653
8173232	FAM123B	6.80706	5.94346	-0.8636
8055688	RND3	8.23061	7.3674	-0.86321
7916282	LRP8	7.91125	7.04825	-0.863
7922410	SNORD44	5.6706	4.80802	-0.86258
8026024	ASNA1	8.92553	8.06349	-0.86204
8144378	AGPAT5	8.32342	7.46168	-0.86174
8021946	COLEC12	7.35489	6.49634	-0.85855
7981011	NA	5.47369	4.61515	-0.85854
8058914	AAMP	8.90929	8.0515	-0.85779
8092578	ETV5	9.58634	8.72936	-0.85698
7982597	THBS1	7.19018	6.33427	-0.85591
7964548	METTL1	6.97491	6.1194	-0.85551
7900350	NA	3.42393	2.56881	-0.85512
8155268	POLR1E	8.68524	7.83029	-0.85495
8166179	CA5BP	7.43898	6.58483	-0.85415
8158446	NUP188	8.99056	8.13684	-0.85372
7930205	LOC729020	5.18804	4.33615	-0.85189
8117079	LOC644714	3.5676	2.71571	-0.85189
8002312	NOB1	8.96771	8.11681	-0.8509
7960575	NOP2	8.73752	7.88674	-0.85078
7971388	SLC25A30	8.02263	7.17549	-0.84714
7984985	GOLGA6A	6.05361	5.21043	-0.84318
8011293	KIAA0664	9.08244	8.23992	-0.84252
8168731	NA	4.38411	3.5417	-0.84241
8087746	NA	5.35071	4.51386	-0.83685
8136495	TTC26	6.26683	5.43113	-0.8357
8010184	NA	5.53134	4.69673	-0.83461
7914245	MECR	8.2597	7.42585	-0.83385
7920697	GBA	7.66204	6.83065	-0.83139
8173299	EDA2R	7.31348	6.48381	-0.82967
8067380	LSM14B	7.14445	6.31507	-0.82938
8023727	DSEL	5.97675	5.1484	-0.82835
7898296	C1orf64	7.97719	7.15008	-0.82711
7904131	DCLRE1B	7.82976	7.00497	-0.82479
8045514	SPOPL	8.30984	7.48945	-0.82039
7995539	NOD2	5.77504	4.95487	-0.82017
7959786	AACS	8.46381	7.64619	-0.81762
8058664	NA	5.09303	4.27675	-0.81628
8000603	TUFM	9.61953	8.80395	-0.81558
8023252	RPL17	8.84887	8.0362	-0.81267
8061706	POFUT1	7.73704	6.92623	-0.81081
7975344	SLC39A9	8.31437	7.5037	-0.81067
8047403	CASP10	6.41006	5.59958	-0.81048
8155847	NA	4.83349	4.02322	-0.81027
8175835	BCAP31	8.7702	7.96032	-0.80988
8146685	RRS1	7.29561	6.4862	-0.80941
7966690	TBX3	10.0144	9.20625	-0.80815
8053797	LOC400986	5.57238	4.76491	-0.80747
7919160	NA	5.61768	4.81082	-0.80686
7919166	NA	5.61768	4.81082	-0.80686
7962831	CCNT1	8.71427	7.90862	-0.80565
8013109	NA	8.2805	7.47506	-0.80544
7955317	ACCN2	7.16733	6.36234	-0.80499
8037005	TGFB1	8.27312	7.46998	-0.80314
7975268	ARG2	9.70447	8.902	-0.80247
7959623	GTF2H3	7.94819	7.14667	-0.80152
8112607	NA	4.16711	3.36631	-0.8008
8001111	UBE2MP1	7.39009	6.5909	-0.79919
8041206	LBH	8.86835	8.0692	-0.79915
8034589	FARSA	9.38845	8.59056	-0.79789
8115164	NA	5.86888	5.07248	-0.7964
8054437	ANAPC1	7.2379	6.44201	-0.79589
7951485	SLC35F2	8.39865	7.60311	-0.79554
8055183	SMPD4	9.56443	8.76928	-0.79515
8028563	MRPS12	7.7844	6.9895	-0.7949
7902435	TPI1	9.3357	8.54194	-0.79376
8007197	NKIRAS2	7.67744	6.88436	-0.79308
8105495	PART1	6.36617	5.58075	-0.78542
7914354	PEF1	8.60608	7.821	-0.78508
7923850	SLC26A9	7.16863	6.38609	-0.78254
8049088	COPS7B	10.1125	9.33187	-0.78063
7960850	SLC2A14	8.65399	7.87349	-0.7805
7948741	B3GAT3	7.98281	7.2026	-0.78021
8063531	C20orf107	4.81481	4.03479	-0.78002
8034512	SNORD41	5.15838	4.37881	-0.77957
7950162	PDE2A	5.616	4.83646	-0.77954
8121605	FAM26D	5.62246	4.84296	-0.7795
7950332	C2CD3	5.97529	5.19904	-0.77625
7915286	PPT1	10.0988	9.3234	-0.7754
7975976	AHSA1	10.8499	10.0745	-0.7754
8077970	FBLN2	8.55907	7.78375	-0.77532
7914153	EYA3	8.45131	7.67608	-0.77523
8025828	LDLR	9.3807	8.6056	-0.7751
7897803	PLOD1	9.80208	9.02738	-0.7747
8043322	ANAPC1	7.25032	6.47573	-0.77459
7984517	GLCE	6.78898	6.01472	-0.77426
7948902	SNORD29	8.08732	7.3138	-0.77352
7929831	HIF1AN	7.72433	6.95356	-0.77077
7929990	PPRC1	8.6258	7.85556	-0.77024
7942476	PAAF1	8.67801	7.90798	-0.77003
8003401	APRT	8.8484	8.07984	-0.76856
8081786	QTRTD1	7.71912	6.9506	-0.76852
8021470	PMAIP1	7.67009	6.9025	-0.76759
8079742	NA	4.66177	3.89419	-0.76758
8088092	RFT1	8.74902	7.98173	-0.76729
8143905	ABCF2	8.42982	7.6636	-0.76622
7937892	PGAP2	8.6083	7.84241	-0.76589
8153664	BOP1	7.75739	6.99293	-0.76446
8146500	LYN	6.83097	6.0666	-0.76437
8161701	TMEM2	9.36724	8.60292	-0.76432
7909568	DTL	9.88676	9.12254	-0.76422
8108593	WDR55	6.59786	5.83592	-0.76194
8171879	LOC100508181	6.21776	5.45612	-0.76164
8110894	NSUN2	9.16277	8.40181	-0.76096
7978132	IPO4	7.65208	6.8916	-0.76048
7936923	ALDOAP2	6.18625	5.42702	-0.75923
7934653	POLR3A	7.89034	7.13155	-0.75879
8019376	DUS1L	7.93502	7.17647	-0.75855
8005202	SNORD49A	6.62215	5.86393	-0.75822
8126324	PGC	7.01701	6.25888	-0.75813
8111101	ANKH	9.14419	8.38624	-0.75795
8043995	IL1R1	7.16305	6.40518	-0.75787
8097474	LOC644714	3.10564	2.3485	-0.75714
8032149	POLR2E	8.05232	7.29528	-0.75704
8012958	UBE2S	10.0767	9.32084	-0.75586
7971950	DACH1	6.70739	5.95305	-0.75434
8171079	GTPBP6	7.56525	6.81097	-0.75428
7964203	BAZ2A	9.33512	8.58138	-0.75374
8165094	QSOX2	6.80071	6.04727	-0.75344
8110084	MSX2	10.6298	9.87773	-0.75207
8092707	LEPREL1	6.86689	6.11529	-0.7516
7948881	WDR74	8.62817	7.87672	-0.75145
8145889	EIF4EBP1	8.49353	7.74242	-0.75111
7953100	FKBP4	11.12	10.369	-0.751
7948896	SNORD22	6.28963	5.53909	-0.75054
8065410	CST4	8.42626	7.67822	-0.74804
7915084	YRDC	7.77324	7.02554	-0.7477
8133202	TYW1	6.31148	5.5644	-0.74708
8110043	BNIP1	7.31112	6.56454	-0.74658
7935146	NOC3L	8.50355	7.75921	-0.74434
7923712	RBBP5	7.21192	6.4684	-0.74352
8054077	ACTR1B	6.79882	6.0554	-0.74342
8003627	TIMM22	9.33224	8.59032	-0.74192
7989770	IGDCC3	6.97736	6.23598	-0.74138
8076569	TTLL12	8.38802	7.64739	-0.74063
7927936	DDX21	10.3316	9.59131	-0.74029
7903619	SARS	10.6071	9.86683	-0.74027
8084439	EIF4G1	10.039	9.29927	-0.73973
8115907	NOP16	10.0529	9.3132	-0.7397
7968890	DGKZ	7.23851	6.49909	-0.73942
8117194	MRS2	9.92543	9.18647	-0.73896
8149749	TNFRSF10D	6.78949	6.05089	-0.7386
8031726	ZNF304	5.63105	4.8928	-0.73825
7923547	CHI3L1	11.0938	10.3563	-0.7375
8039062	ZNF665	4.62622	3.88915	-0.73707
7979696	NA	3.4578	2.72201	-0.73579
8167797	GNL3L	7.49152	6.75701	-0.73451
8009693	TMEM104	7.90434	7.17009	-0.73425
7947867	PSMC3	10.3262	9.59272	-0.73348
7980454	ALKBH1	7.56103	6.82839	-0.73264
8150318	FGFR1	7.44356	6.71206	-0.7315
8158242	URM1	8.22	7.48868	-0.73132
7962487	RACGAP1P	5.23918	4.5085	-0.73068
7959292	NA	3.71804	2.98766	-0.73038
7996891	CIRH1A	9.1882	8.45934	-0.72886
8004694	CYB5D1	7.38087	6.65201	-0.72886
8099965	ACOT7	9.33951	8.61149	-0.72802
7915147	FHL3	7.89865	7.17132	-0.72733
8033458	LYPLA2	8.9278	8.20067	-0.72713
7930226	PDCD11	8.36935	7.64368	-0.72567
8117189	KAAG1	7.6554	6.93051	-0.72489
7938834	NAV2	9.25327	8.52887	-0.7244
8126360	MED20	7.85225	7.12817	-0.72408
8030823	IGLON5	5.23769	4.51503	-0.72266
8059854	ARL4C	9.7734	9.05079	-0.72261
8119492	BYSL	7.92181	7.20023	-0.72158
7939365	FJX1	8.50683	7.7854	-0.72143
8129309	NA	3.54965	2.82844	-0.72121
8145291	SLC25A37	6.06758	5.34669	-0.72089
8127130	GCM1	5.02575	4.30558	-0.72017
8016552	PHB	11.6311	10.911	-0.7201
7940372	TMEM109	8.80982	8.09012	-0.7197
8148728	CYC1	9.83787	9.11879	-0.71908
8131339	FSCN1	10.0376	9.3186	-0.719
8138745	HOXA7	8.51268	7.79398	-0.7187
8025351	MAP2K7	6.24	5.52131	-0.71869
8092836	CPN2	10.3457	9.62768	-0.71802
7953532	ENO2	8.52548	7.808	-0.71748
8043791	INPP4A	6.69071	5.97344	-0.71727
8167270	FTSJ1	8.60467	7.88764	-0.71703
7970473	XPO4	7.72428	7.0077	-0.71658
7907353	METTL13	7.07361	6.35705	-0.71656
8125748	LYPLA2P1	9.25643	8.54002	-0.71641
8077441	BHLHE40	7.97938	7.26443	-0.71495
8103011	OTUD4	5.26963	4.55557	-0.71406
8166580	NA	7.90032	7.18629	-0.71403
7933084	NAMPT	9.34214	8.62828	-0.71386
7948910	SNORD25	6.94719	6.23562	-0.71157
8175947	HCFC1	8.46658	7.75575	-0.71083
8101224	NA	7.61504	6.9048	-0.71024
8151423	JPH1	6.49626	5.78613	-0.71013
7967473	EIF2B1	9.36511	8.65515	-0.70996
8072160	ZNRF3	8.32715	7.61792	-0.70923
7954077	KIAA1467	7.11591	6.40673	-0.70918
7981976	SNORD116-14	7.12904	6.41998	-0.70906
8030105	FGF21	4.43826	3.72932	-0.70894
7953689	NANOGP1	5.75167	5.04321	-0.70846
8025601	ICAM1	7.71501	7.00736	-0.70765
8011245	TSR1	9.00733	8.29979	-0.70754
8032909	PLIN3	9.29187	8.58433	-0.70754
8112666	NA	5.22783	4.52108	-0.70675
8045776	GALNT13	5.6659	4.95988	-0.70602
7923503	ADIPOR1	9.8943	9.18964	-0.70466
7970162	ATP11A	9.39802	8.69338	-0.70464
7899562	PTPRU	8.47513	7.77142	-0.70371
7962146	FAM60A	10.3258	9.62376	-0.70204
7962197	NA	4.00484	3.30366	-0.70118
7921110	ISG20L2	9.15143	8.45039	-0.70104
7953715	NECAP1	9.45706	8.75639	-0.70067
8079753	DAG1	9.04852	8.34839	-0.70013
7950197	ARAP1	6.64772	5.9477	-0.70002
8145782	MAK16	8.55878	7.86035	-0.69843
8102800	SLC7A11	7.10695	6.40871	-0.69824
7968212	WASF3	9.29131	8.59307	-0.69824
7987584	INO80	6.82403	6.12722	-0.69681
7986359	IGF1R	8.41142	7.71623	-0.69519
7910164	ADCK3	7.51805	6.82293	-0.69512
8076563	MCAT	7.74684	7.05219	-0.69465
8078991	ZNF619	5.25096	4.55666	-0.6943
8019796	MAFG	8.5035	7.80983	-0.69367
7900510	CTPS	9.56252	8.86911	-0.69341
8141688	PLOD3	9.51062	8.81771	-0.69291
8116020	LMAN2	10.651	9.9585	-0.6925
8088560	ADAMTS9	7.55748	6.86504	-0.69244
7999079	ADCY9	8.20625	7.51417	-0.69208
7905171	PRPF3	8.42855	7.73653	-0.69202
8026300	CD97	9.08534	8.39341	-0.69193
8025414	RAB11B	9.18834	8.49711	-0.69123
8124518	HIST1H2AJ	6.49219	5.80096	-0.69123
7926330	MEIG1	3.86791	3.17682	-0.69109
8028084	APLP1	6.34603	5.65507	-0.69096
8118734	ITPR3	7.95858	7.26765	-0.69093
8159006	SNORD36B	4.61351	3.92258	-0.69093
7990379	EDC3	7.53051	6.84089	-0.68962
7953697	NA	9.99825	9.30888	-0.68937
7969171	DLEU1	7.42318	6.73467	-0.68851
8117955	MRPS18B	10.5031	9.81484	-0.68826
8177824	MRPS18B	10.5031	9.81484	-0.68826
8179139	MRPS18B	10.5031	9.81484	-0.68826
8018352	SLC25A19	7.02094	6.3328	-0.68814
8076046	TMEM184B	10.4238	9.73639	-0.68741
8000482	XPO6	9.81643	9.12913	-0.6873
8033554	CD320	9.26151	8.57425	-0.68726
8139796	LOC441233	3.90149	3.21457	-0.68692
8071662	GGTLC2	7.64031	6.95359	-0.68672
7994889	SRCAP	7.87902	7.19246	-0.68656
8019263	ARHGDIA	9.90664	9.2202	-0.68644
8090448	RUVBL1	10.7413	10.0551	-0.6862
7936096	PDCD11	9.10479	8.41872	-0.68607
7993807	TMEM159	6.88991	6.20567	-0.68424
8140020	NSUN5	8.19675	7.51257	-0.68418
7942830	GCRG224	5.99702	5.31301	-0.68401
7944978	EI24	9.77777	9.09428	-0.68349
8020806	RNF125	4.30447	3.62326	-0.68121
7951467	ALKBH8	6.18087	5.4997	-0.68117
7912112	DNAJC11	9.24913	8.56838	-0.68075
7981982	SNORD116-17	8.88982	8.20911	-0.68071
7981986	SNORD116-17	8.88982	8.20911	-0.68071
7952205	MCAM	6.6852	6.0046	-0.6806
8020323	RNMT	7.68396	7.00505	-0.67891
8139299	POLD2	9.98112	9.30221	-0.67891
8106193	UTP15	7.59665	6.91899	-0.67766
7916219	C1orf163	8.6513	7.97396	-0.67734
8117580	HIST1H2AI	7.98222	7.30527	-0.67695
8087833	DUSP7	8.53009	7.85416	-0.67593
8069943	URB1	7.17685	6.50094	-0.67591
8121743	NA	7.05049	6.37462	-0.67587
7919591	FAM72D	8.81586	8.14016	-0.6757
7925876	PFKP	9.18468	8.51034	-0.67434
7934553	ZNF503	7.39305	6.71881	-0.67424
8031102	PRPF31	8.09448	7.42064	-0.67384
8030630	NR1H2	6.21276	5.53911	-0.67365
7945071	FOXRED1	7.70739	7.03375	-0.67364
7984298	DIS3L	8.11587	7.44285	-0.67302
7955736	ESPL1	8.80558	8.13365	-0.67193
7903884	PROK1	6.24269	5.57085	-0.67184
7917649	TGFBR3	8.38468	7.7138	-0.67088
8118116	MICB	6.58198	5.91164	-0.67034
8160332	MLLT3	9.88381	9.21352	-0.67029
8034299	ELOF1	7.45077	6.78081	-0.66996
8070601	NA	2.80986	2.14006	-0.6698
8161373	NA	5.59618	4.92643	-0.66975
8161554	NA	5.59618	4.92643	-0.66975
8158918	GTF3C4	7.74635	7.07667	-0.66968
8029521	TOMM40	7.16858	6.49995	-0.66863
8047563	NA	3.7746	3.10608	-0.66852
8160857	SIGMAR1	8.53895	7.87079	-0.66816
8073875	TRMU	7.93118	7.26323	-0.66795
7897469	TMEM201	7.21142	6.5441	-0.66732
8041149	WDR43	10.1999	9.53286	-0.66704
8032839	SEMA6B	6.64977	5.98301	-0.66676
7996022	CCL22	7.21418	6.54759	-0.66659
8059708	SNORA75	4.80216	4.13634	-0.66582
7982712	C15orf23	8.89006	8.22502	-0.66504
8033789	ZNF121	8.71164	8.04782	-0.66382
8158568	USP20	6.01002	5.34655	-0.66347
8022692	DSC3	7.10332	6.44001	-0.66331
7922406	SNORD79	6.13912	5.47667	-0.66245
8144036	XRCC2	7.45675	6.79433	-0.66242
8158961	GTF3C5	9.12093	8.45897	-0.66196
8164481	C9orf114	7.79652	7.13507	-0.66145
8160682	NOL6	7.88479	7.22457	-0.66022
8015526	KAT2A	7.88668	7.22659	-0.66009
7899173	DHDDS	8.31664	7.65671	-0.65993
8002082	GFOD2	5.25784	4.59807	-0.65977
7966213	MMAB	8.91376	8.25464	-0.65912
7912198	ENO1	12.3617	11.7026	-0.6591
8133961	RUNDC3B	6.82686	6.1681	-0.65876
8088550	PRICKLE2	6.56079	5.90206	-0.65873
7936463	ABLIM1	9.22512	8.56705	-0.65807
8026875	SNORA68	6.52761	5.86959	-0.65802
8088106	TKT	10.383	9.72528	-0.65772
8152297	ANGPT1	5.52229	4.86539	-0.6569
7922402	SNORD47	7.79231	7.13691	-0.6554
8049317	DGKD	7.79355	7.13879	-0.65476
7963406	KRT6B	4.81204	4.15745	-0.65459
7953483	USP5	8.30803	7.65358	-0.65445
8141395	MCM7	9.89424	9.23993	-0.65431
7958455	UNG	8.99142	8.3372	-0.65422
8006634	PIGW	5.84429	5.19059	-0.6537
8116848	PAK1IP1	9.04624	8.39356	-0.65268
8125919	FKBP5	7.03557	6.38324	-0.65233
7900931	B4GALT2	8.95413	8.3026	-0.65153
8009253	LOC100510740	4.95001	4.299	-0.65101
7926259	MCM10	8.36161	7.71171	-0.6499
8027642	PDCD2L	8.01147	7.36176	-0.64971
7899504	GMEB1	7.7471	7.09795	-0.64915
8125941	SRPK1	9.36786	8.71888	-0.64898
7935425	RRP12	7.26063	6.61246	-0.64817
7954465	NA	8.25403	7.60588	-0.64815
8024900	UHRF1	7.56025	6.91215	-0.6481
8114628	HARS	8.54686	7.89902	-0.64784
7964064	CS	10.5173	9.86977	-0.64753
8114455	HSPA9	11.026	10.3787	-0.6473
8079517	KLHL18	6.44659	5.79938	-0.64721
8154823	ANKRD18B	6.18371	5.53735	-0.64636
8063857	GTPBP5	7.47099	6.82466	-0.64633
8076374	NHP2L1	9.63026	8.98435	-0.64591
8002381	COG4	8.17275	7.52718	-0.64557
7968056	LOC374491	4.62071	3.97627	-0.64444
8164872	MED22	7.29843	6.65409	-0.64434
8062844	TTPAL	7.86168	7.21743	-0.64425
7921862	C1orf192	6.78629	6.14208	-0.64421
8043036	LOC1720	10.0404	9.39644	-0.64396
8030113	RUVBL2	9.50553	8.8617	-0.64383
7953594	EMG1	10.2636	9.62032	-0.64328
8112202	PLK2	8.50863	7.86597	-0.64266
8115410	GEMIN5	7.84961	7.20716	-0.64245
7998692	NTHL1	7.66202	7.01958	-0.64244
8153390	TOP1MT	8.61359	7.97196	-0.64163
7948630	FADS3	8.68571	8.04421	-0.6415
8042830	MTHFD2	10.3086	9.66714	-0.64146
8125091	VARS	7.67777	7.03728	-0.64049
8178609	VARS	7.67777	7.03728	-0.64049
8149296	PINX1	7.99065	7.35052	-0.64013
8125780	IP6K3	6.30103	5.6614	-0.63963
8127031	MCM3	9.71816	9.0791	-0.63906
8048370	BCS1L	7.87877	7.23979	-0.63898
8160712	SUGT1P1	4.64623	4.00745	-0.63878
7975506	DCAF4	6.02932	5.39112	-0.6382
8010946	GEMIN4	7.66169	7.02367	-0.63802
8024497	THOP1	7.31594	6.67842	-0.63752
8137798	PSMG3	8.64758	8.01044	-0.63714
7963935	DNAJC14	8.77888	8.14181	-0.63707
8043564	FAHD2A	7.95027	7.31421	-0.63606
7905731	NA	4.76027	4.12493	-0.63534
8033002	LONP1	8.45038	7.81528	-0.6351
8065738	AHCY	11.2057	10.5709	-0.6348
8078014	SLC6A6	9.70376	9.06907	-0.63469
8064191	TPD52L2	9.31527	8.68137	-0.6339
8065889	UQCC	5.94954	5.31566	-0.63388
8168762	CSTF2	7.68565	7.05258	-0.63307
8081779	ZDHHC23	6.5601	5.9271	-0.633
8048120	ATIC	10.6636	10.0308	-0.6328
7910416	URB2	6.76355	6.13078	-0.63277
8071212	CDC45	8.71681	8.08433	-0.63248
7912956	RCC2	10.2376	9.60529	-0.63231
7912994	IFFO2	6.04857	5.41892	-0.62965
8079896	SEMA3F	6.98686	6.35725	-0.62961
8045247	PLEKHB2	9.61141	8.98181	-0.6296
8157638	MRRF	8.23185	7.6026	-0.62925
8026520	RAB8A	9.07087	8.44181	-0.62906
8034615	TRMT1	6.32841	5.69943	-0.62898
7990657	TBC1D2B	5.83543	5.20672	-0.62871
8147548	POP1	7.07807	6.44944	-0.62863
8124446	NA	6.74693	6.11939	-0.62754
8010562	BAIAP2	7.13258	6.50507	-0.62751
8178476	BAT1	10.7229	10.0956	-0.6273
8039593	ZNF667	4.92073	4.29359	-0.62714
7914563	YARS	10.6843	10.0576	-0.6267
8175642	CXorf40B	6.92327	6.29666	-0.62661
8069026	C21orf33	7.81193	7.18535	-0.62658
7912155	NA	7.15287	6.52682	-0.62605
8053975	LMAN2L	6.50305	5.87807	-0.62498
8124430	HIST1H1D	7.7296	7.10497	-0.62463
8019350	STRA13	8.89321	8.26872	-0.62449
7989628	CSNK1G1	6.93994	6.31561	-0.62433
8084171	NA	3.71078	3.087	-0.62378
7963174	LASS5	7.64885	7.02534	-0.62351
8164729	TTF1	6.73164	6.10863	-0.62301
8124926	BAT1	10.4988	9.8758	-0.623
8177955	MICB	6.49617	5.8736	-0.62257
8112615	ENC1	8.25513	7.63261	-0.62252
8135922	METTL2B	7.0463	6.42429	-0.62201
8022514	C18orf45	6.18737	5.56604	-0.62133
8101207	ANKRD56	5.57729	4.95601	-0.62128
7925364	HEATR1	8.8321	8.21083	-0.62127
8119974	SLC29A1	9.65083	9.03029	-0.62054
8110803	CLPTM1L	7.73248	7.11293	-0.61955
8170648	BGN	10.7002	10.0807	-0.6195
8097335	HSPA4L	8.19726	7.57791	-0.61935
8128606	RTN4IP1	7.60101	6.98166	-0.61935
7902810	LMO4	6.97064	6.35237	-0.61827
7977933	SLC7A8	9.07507	8.45752	-0.61755
8016099	EFTUD2	9.75675	9.13923	-0.61752
7929591	NA	3.33037	2.7134	-0.61697
8179750	BAT1	10.7964	10.1803	-0.6161
8068180	HUNK	8.73263	8.11656	-0.61607
8160284	HAUS6	9.1719	8.556	-0.6159
8171418	PIGA	6.36266	5.74703	-0.61563
7940349	CCDC86	7.53836	6.92282	-0.61554
7932864	LYZL2	3.53095	2.91584	-0.61511
8073596	SERHL2	5.13089	4.51581	-0.61508
8034021	CDC37	10.3254	9.71045	-0.61495
8111629	NUP155	9.15806	8.54334	-0.61472
8120698	MTO1	7.59182	6.97753	-0.61429
8010747	GPS1	9.4299	8.81582	-0.61408
7977482	TTC5	6.01699	5.40301	-0.61398
7973448	DHRS4	7.62588	7.01199	-0.61389
8075785	FOXRED2	8.90322	8.28938	-0.61384
8169156	NA	4.97346	4.3597	-0.61376
8154163	RCL1	8.45812	7.84477	-0.61335
8052861	SNRPG	6.3709	5.75767	-0.61323
8126646	MRPS18A	9.73683	9.12393	-0.6129
8004293	C17orf81	8.32546	7.71269	-0.61277
7979044	NIN	7.22451	6.61175	-0.61276
8065416	CST2	7.56733	6.95499	-0.61234
8018511	MRPL38	8.70011	8.08783	-0.61228
8148124	MTBP	6.69389	6.08186	-0.61203
7977820	PRMT5	9.62152	9.00954	-0.61198
8035236	HAUS8	7.65252	7.04065	-0.61187
8077817	SLC6A11	7.60985	6.99804	-0.61181
7953395	COPS7A	9.49419	8.8825	-0.61169
7917850	ARHGAP29	8.61387	8.00268	-0.61119
8163672	PAPPA	5.11711	4.50677	-0.61034
8164833	GBGT1	7.02086	6.41064	-0.61022
8068902	RRP1B	8.69736	8.08758	-0.60978
8046488	CDCA7	7.89971	7.29003	-0.60968
8174889	MRRFP1	5.31523	4.70667	-0.60856
8142774	RBM28	8.66559	8.05746	-0.60813
7918255	CLCC1	8.9158	8.30802	-0.60778
8166230	TXLNG	8.38211	7.77435	-0.60776
8159609	SSNA1	8.99375	8.38725	-0.6065
8084488	POLR2H	10.8673	10.2613	-0.606
7906746	SDHC	7.94511	7.33925	-0.60586
7917359	ZNHIT6	8.48695	7.88183	-0.60512
8018849	TK1	10.2067	9.60191	-0.60479
7972297	ABCC4	5.97681	5.37203	-0.60478
8088830	SHQ1	7.30958	6.70481	-0.60477
7912303	DFFA	8.66078	8.05683	-0.60395
8014454	MYO19	7.72983	7.12592	-0.60391
7964828	NA	10.6328	10.029	-0.6038
8105545	IPO11	8.34068	7.73717	-0.60351
8087576	IFRD2	7.77244	7.1694	-0.60304
8103188	PET112L	7.88475	7.28181	-0.60294
8117608	HIST1H2AL	8.98948	8.38665	-0.60283
8131111	EIF3B	10.0085	9.40596	-0.60254
8174474	ACSL4	9.18571	8.58365	-0.60206
7922404	SNORD80	7.73873	7.13687	-0.60186
7952335	SNORD14E	6.40612	5.80459	-0.60153
8160914	VCP	10.6836	10.0825	-0.6011
8030366	SNORD35A	6.6645	6.06355	-0.60095
8137675	PRKAR1B	7.3813	6.78057	-0.60073
8049542	LRRFIP1	5.72131	5.1206	-0.60071
7942118	MYEOV	6.21	5.61018	-0.59982
8107282	WDR36	7.96092	7.36129	-0.59963
8007355	VPS25	9.90713	9.30827	-0.59886
7909478	C1orf107	7.04262	6.44384	-0.59878
8012257	TP53	8.95836	8.3601	-0.59826
8067955	CXADR	9.54251	8.94425	-0.59826
8104825	BRIX1	8.56256	7.96524	-0.59732
8035628	NR2C2AP	8.61402	8.01672	-0.5973
8085914	SLC4A7	5.85894	5.26215	-0.59679
8116740	RREB1	7.69413	7.09804	-0.59609
8004266	SLC16A13	9.21415	8.61807	-0.59608
7961483	HIST4H4	4.96401	4.36835	-0.59566
8037433	ZNF45	4.31795	3.72274	-0.59521
8053909	SNRNP200	10.3539	9.75899	-0.59491
7916862	WLS	11.1867	10.5922	-0.5945
8098214	TLL1	4.7941	4.1997	-0.5944
8176076	DNASE1L1	6.61198	6.01792	-0.59406
8031344	KIR3DL1	5.88262	5.28871	-0.59391
8018708	UBE2O	7.42832	6.83476	-0.59356
7910190	ZNF678	6.20082	5.60749	-0.59333
8016018	SLC25A39	9.63286	9.03957	-0.59329
8096635	NFKB1	7.32	6.72676	-0.59324
7965675	NA	5.59858	5.0055	-0.59308
7917251	C1orf180	4.28877	3.69625	-0.59252
8063923	SLCO4A1	6.97967	6.38758	-0.59209
7973900	C14orf19	4.51373	3.9223	-0.59143
8016562	SPOP	8.6257	8.03435	-0.59135
7996919	VPS4A	8.05097	7.45967	-0.5913
8069561	BTF3L4	10.6519	10.0617	-0.5902
8084423	PSMD2	9.59478	9.00468	-0.5901
8108050	TCF7	8.36169	7.77193	-0.58976
8069838	KRTAP19-5	5.11186	4.52223	-0.58963
7975987	NA	4.94262	4.35319	-0.58943
8103722	HSP90AA6P	4.20766	3.61876	-0.5889
8046975	WDR75	8.93515	8.34626	-0.58889
7937802	CD81	10.3109	9.72288	-0.58802
8124510	HIST1H2BL	6.50218	5.91417	-0.58801
8022640	DHFR	9.9558	9.36885	-0.58695
8114185	CDKN2AIPNL	8.26567	7.67933	-0.58634
7921487	TAGLN2	8.53519	7.94906	-0.58613
8139468	TBRG4	8.95018	8.36475	-0.58543
7915567	ERI3	8.73026	8.14492	-0.58534
8144894	INTS10	7.84436	7.25914	-0.58522
8014925	MED24	8.49242	7.90737	-0.58505
8068610	NA	4.37532	3.79049	-0.58483
8084064	MTHFD2	9.78126	9.1965	-0.58476
8147049	FABP5	9.50634	8.92197	-0.58437
7985317	KIAA1199	6.65042	6.06615	-0.58427
8003621	RNMTL1	7.43164	6.84745	-0.58419
8139456	SNORA9	5.95604	5.37223	-0.58381
7922669	STX6	7.46058	6.87697	-0.58361
8112409	SGTB	7.2547	6.67143	-0.58327
7950142	CLPB	8.41209	7.82917	-0.58292
7975224	EIF2S1	10.022	9.43922	-0.58278
8008297	XYLT2	7.42502	6.84229	-0.58273
8019392	FASN	9.35295	8.77049	-0.58246
8167965	MSN	11.2118	10.6297	-0.5821
8095221	PAICS	8.69973	8.11767	-0.58206
7982309	FAN1	5.89547	5.31347	-0.582
8121601	FAM26E	5.13405	4.55248	-0.58157
8110916	LOC442132	6.87106	6.28962	-0.58144
7946655	CSNK2A1P	9.80103	9.21974	-0.58129
7996725	DUS2L	6.64695	6.06573	-0.58122
7991395	GABARAPL3	4.60605	4.02488	-0.58117
7996211	GINS3	6.18964	5.60882	-0.58082
8118863	ANKS1A	8.07791	7.4971	-0.58081
7961540	RERG	5.92514	5.34473	-0.58041
8078619	ITGA9	7.13892	6.55864	-0.58028
8151572	SNX16	5.96819	5.38826	-0.57993
8158714	EXOSC2	9.98812	9.40833	-0.57979
8079662	ARIH2	8.83292	8.25321	-0.57971
7953936	C12orf59	10.1685	9.58894	-0.57956
8042720	CCT7	11.3379	10.7588	-0.5791
8146130	GINS4	7.15332	6.57423	-0.57909
7913110	KIAA0090	8.25447	7.67598	-0.57849
8050302	ROCK2	9.95871	9.38053	-0.57818
8117522	ABT1	7.08604	6.50789	-0.57815
8119661	RRP36	7.74914	7.17115	-0.57799
8126531	CRIP3	7.99989	7.42192	-0.57797
8019316	PYCR1	8.66868	8.09076	-0.57792
7953200	CCND2	8.65731	8.08013	-0.57718
7992795	THOC6	7.87646	7.30001	-0.57645
7967493	NCOR2	8.36502	7.78866	-0.57636
8028756	PSMC4	9.88215	9.30598	-0.57617
8082229	UMPS	9.8972	9.32105	-0.57615
8001387	SALL1	7.4908	6.91471	-0.57609
7909782	RRP15	9.37531	8.80042	-0.57489
7996761	PLA2G15	6.29794	5.72341	-0.57453
8119503	TAF8	7.69278	7.11826	-0.57452
8173522	NA	4.40284	3.82841	-0.57443
8178526	BAT3	9.61672	9.04231	-0.57441
8179782	BAT3	9.61672	9.04231	-0.57441
8086880	CDC25A	7.62796	7.05392	-0.57404
7987892	ZFP106	7.59721	7.0234	-0.57381
8166049	PRPS2	8.28598	7.71219	-0.57379
8059710	SNORD20	3.26672	2.69318	-0.57354
8088090	RFT1	6.63274	6.05943	-0.57331
8100428	CLOCK	6.95724	6.3842	-0.57304
8088895	FAM86DP	7.06497	6.49228	-0.57269
8084303	EIF2B5	8.41852	7.8459	-0.57262
7948420	FABP5	9.45936	8.88689	-0.57247
8099051	NOP14	9.70098	9.12867	-0.57231
8073343	NA	8.13992	7.56792	-0.572
8117594	HIST1H2BM	8.95938	8.38798	-0.5714
7915543	SLC6A9	6.86166	6.29028	-0.57138
8123728	LYRM4	7.59645	7.02583	-0.57062
8063949	C20orf20	8.56801	7.99763	-0.57038
8112807	ARSB	6.35295	5.7826	-0.57035
8005865	SARM1	7.68937	7.1192	-0.57017
7997179	DHODH	6.35382	5.78395	-0.56987
7956894	HELB	7.03361	6.46397	-0.56964
7904433	PHGDH	9.84639	9.27676	-0.56963
7913990	GPATCH3	6.97728	6.40769	-0.56959
7901010	KIF2C	8.07254	7.50319	-0.56935
8162421	IPPK	7.16374	6.59458	-0.56916
8126588	XPO5	8.9649	8.39583	-0.56907
7960689	MLF2	9.75165	9.18269	-0.56896
8027117	ARMC6	6.36644	5.79798	-0.56846
7953943	GABARAPL1	9.29456	8.7265	-0.56806
8039928	FAM72D	8.78437	8.21692	-0.56745
8007108	TMEM99	7.93374	7.36654	-0.5672
7937287	PSMD13	9.86077	9.29368	-0.56709
7963646	AAAS	10.5586	9.99152	-0.56708
8109254	TCOF1	8.50075	7.93399	-0.56676
8152323	EIF3E	10.5467	9.97994	-0.56676
8117241	NA	4.65351	4.0872	-0.56631
8037023	EXOSC5	7.91813	7.35249	-0.56564
7951038	SNORA40	7.08004	6.51456	-0.56548
8110966	FAM173B	7.23027	6.66484	-0.56543
7912481	MAD2L2	9.01602	8.45107	-0.56495
7973458	DHRS4L2	7.64313	7.0783	-0.56483
7994109	PLK1	10.7688	10.204	-0.5648
7927599	ASAH2	7.91578	7.35142	-0.56436
8051066	MPV17	9.99639	9.43275	-0.56364
8022342	AFG3L2	8.86468	8.3012	-0.56348
8017133	SKA2	7.70646	7.143	-0.56346
8072575	NA	3.28513	2.72212	-0.56301
7914904	STK40	7.4678	6.90517	-0.56263
8047243	2002-03-01	6.80428	6.24166	-0.56262
7966301	ANAPC7	8.98312	8.42072	-0.5624
8073585	SERHL	6.25245	5.69008	-0.56237
8058855	NA	5.90983	5.34754	-0.56229
8020814	RNF138	7.67959	7.1174	-0.56219
8156905	TMEFF1	8.24271	7.68065	-0.56206
7914296	PUM1	10.1757	9.61404	-0.56166
7945262	JAM3	6.79773	6.23634	-0.56139
8109438	LARP1	10.134	9.5728	-0.5612
8085033	LMLN	5.94585	5.38544	-0.56041
8000244	USP31	7.82498	7.26481	-0.56017
8117237	NA	9.42101	8.86107	-0.55994
7927383	ZNF488	6.70638	6.14668	-0.5597
8150877	SNORD54	4.80311	4.2438	-0.55931
7959986	PUS1	7.65211	7.09305	-0.55906
8142120	NAMPT	9.27999	8.72102	-0.55897
8063382	SNAI1	7.45651	6.89772	-0.55879
8119161	PIM1	8.39419	7.83541	-0.55878
8024798	CCDC94	7.74219	7.1839	-0.55829
8105842	CENPH	7.62617	7.06874	-0.55743
7997839	CDT1	8.23704	7.67976	-0.55728
7982564	SPRED1	7.17788	6.6208	-0.55708
8152962	LRRC6	4.19946	3.64283	-0.55663
8039491	UBE2S	9.79022	9.23359	-0.55663
8170971	DKC1	10.1415	9.58492	-0.55658
8019523	WDR45L	9.07211	8.51564	-0.55647
8093256	NA	10.7035	10.1475	-0.556
8088745	FRMD4B	7.29764	6.74189	-0.55575
7912724	ARHGEF19	6.11642	5.56094	-0.55548
7945539	SLC25A22	7.03553	6.48047	-0.55506
8081878	NA	5.01601	4.46108	-0.55493
8142912	TMEM209	9.61487	9.06015	-0.55472
8165156	SDCCAG3	8.53448	7.97991	-0.55457
7972682	KDELC1	6.31647	5.76198	-0.55449
8016382	SP6	6.70095	6.14647	-0.55448
7897801	RNU5E	5.58125	5.027	-0.55425
7975121	FNTB	7.41758	6.86355	-0.55403
8082368	PODXL2	8.26283	7.7094	-0.55343
8179391	STK19	6.40035	5.8474	-0.55295
7952249	USP2	5.78304	5.2303	-0.55274
7966929	RAB35	8.65716	8.10481	-0.55235
8013696	KIAA0100	8.38308	7.83126	-0.55182
7902660	WDR63	4.70265	4.15097	-0.55168
8049532	LRRFIP1	6.12854	5.57695	-0.55159
8077914	TSEN2	6.14394	5.59255	-0.55139
8167603	CLCN5	8.51971	7.96851	-0.5512
7921179	ARHGEF11	7.34473	6.79361	-0.55112
8140859	MTERF	7.22921	6.67826	-0.55095
8077198	FLJ43315	4.55759	4.00727	-0.55032
8005847	TNFAIP1	8.18111	7.63083	-0.55028
7909146	FAM72D	8.84683	8.29713	-0.5497
7989915	TIPIN	9.75253	9.20285	-0.54968
7914021	SLC9A1	8.07007	7.52091	-0.54916
7980603	NA	4.15455	3.60583	-0.54872
8132646	CCM2	7.73054	7.18189	-0.54865
7910369	HIST3H2BB	5.28341	4.73547	-0.54794
8121300	QRSL1	8.12393	7.57605	-0.54788
7908125	RGL1	9.31557	8.76801	-0.54756
7949545	EIF1AD	8.42334	7.87644	-0.5469
7923578	FMOD	8.82078	8.27413	-0.54665
8174891	NA	7.44683	6.90052	-0.54631
8016139	KIF18B	8.4089	7.86267	-0.54623
7905365	PIP5K1A	9.74848	9.20279	-0.54569
8142852	TNPO3	9.32281	8.77746	-0.54535
8090364	ZXDC	5.35797	4.81263	-0.54534
7948836	TMEM223	8.7451	8.20036	-0.54474
7982299	LOC390561	5.0264	4.48185	-0.54455
8152255	SLC25A32	8.17022	7.62569	-0.54453
8153201	EIF2C2	8.03864	7.49411	-0.54453
7904452	FAM72D	8.86667	8.32221	-0.54446
8005305	C17orf39	8.24214	7.69805	-0.54409
7905481	NA	6.34739	5.80343	-0.54396
8030360	SNORD32A	7.5824	7.03853	-0.54387
7913801	NA	3.77288	3.22955	-0.54333
8002403	MTSS1L	8.66602	8.1227	-0.54332
8065011	LIN28A	7.62832	7.08506	-0.54326
8026122	RAD23A	9.14591	8.60307	-0.54284
8030978	ZNF845	7.63972	7.09716	-0.54256
8117128	E2F3	6.01647	5.47431	-0.54216
8023955	BSG	10.6946	10.1528	-0.5418
7916167	ORC1	8.10946	7.56784	-0.54162
8034482	TNPO2	8.3359	7.7943	-0.5416
8124391	HIST1H2AB	7.92269	7.38114	-0.54155
8133331	POM121	10.0206	9.47915	-0.54145
7999468	LITAF	9.87534	9.33435	-0.54099
7989975	CLN6	8.44695	7.90623	-0.54072
7949744	LOC100505593	3.63992	3.09952	-0.5404
8017096	NA	6.32783	5.78747	-0.54036
8120428	FKBP1A	10.9425	10.4022	-0.5403
8094148	NA	6.784	6.24372	-0.54028
8075063	HPS4	6.13223	5.59204	-0.54019
8072883	NOL12	7.46318	6.92388	-0.5393
7960865	SLC2A3	12.4994	11.9602	-0.5392
8007290	MLX	8.75068	8.21165	-0.53903
8159249	MRPS2	10.0841	9.5455	-0.5386
8068478	CHAF1B	8.40643	7.86798	-0.53845
8131286	RNF216L	6.42808	5.88992	-0.53816
7914282	SDC3	7.10174	6.56443	-0.53731
7987145	FMN1	5.6623	5.12509	-0.53721
7948995	ATL3	8.07291	7.53584	-0.53707
8154727	LOC138412	10.2079	9.67085	-0.53705
8062190	SPAG4	5.39736	4.86042	-0.53694
8112709	POC5	7.1032	6.56636	-0.53684
8124537	HIST1H3J	10.7674	10.2306	-0.5368
8052721	PPP3R1	9.43165	8.89647	-0.53518
8002152	SLC12A4	7.24527	6.71016	-0.53511
8027621	GPI	10.5398	10.005	-0.5348
7897824	MFN2	9.42703	8.89237	-0.53466
8149281	NA	3.17219	2.63773	-0.53446
8119198	FTSJD2	7.76871	7.2353	-0.53341
8072488	DRG1	9.51154	8.97813	-0.53341
8164742	DDX31	7.55459	7.02136	-0.53323
7944435	HINFP	7.82771	7.29456	-0.53315
8093145	C3orf34	6.45539	5.92226	-0.53313
8013179	ATPAF2	7.58551	7.05273	-0.53278
8011861	DHX33	8.34944	7.8167	-0.53274
8118794	HMGA1	9.5326	8.99988	-0.53272
8078738	OXSR1	8.48935	7.95713	-0.53222
8075529	PISD	7.26461	6.73264	-0.53197
7929976	DPCD	8.22615	7.69483	-0.53132
7964522	CDK4	11.4044	10.8731	-0.5313
8011222	SMG6	6.62481	6.0936	-0.53121
8005707	MAP2K3	7.18454	6.6534	-0.53114
8099721	SEL1L3	7.35209	6.82106	-0.53103
8073242	ADSL	8.96544	8.43446	-0.53098
8043585	CIAO1	8.33185	7.80103	-0.53082
8029188	ZNF526	7.2324	6.70166	-0.53074
7961142	OLR1	9.06629	8.53593	-0.53036
8010673	SLC25A10	8.37433	7.844	-0.53033
7956162	ZC3H10	5.77786	5.24767	-0.53019
7955777	C12orf10	9.83983	9.30977	-0.53006
7901418	BTF3L4	10.9728	10.4429	-0.5299
7945902	NUP98	9.58218	9.05232	-0.52986
8142981	PODXL	10.1453	9.61551	-0.52979
8056220	AHCTF1	7.42203	6.89254	-0.52949
7915659	HECTD3	8.38898	7.85965	-0.52933
7962427	PUS7L	8.01041	7.48128	-0.52913
8045171	IMP4	9.70985	9.18081	-0.52904
7896961	ATAD3B	8.22537	7.69637	-0.529
8051012	PREB	9.57739	9.04842	-0.52897
7967863	ZNF605	6.15125	5.62237	-0.52888
8080762	ABHD6	6.45436	5.92549	-0.52887
8087283	QARS	10.2799	9.75143	-0.52847
8018482	WBP2	9.65527	9.127	-0.52827
7948696	MTA2	9.26595	8.73779	-0.52816
7935692	ERLIN1	10.3593	9.83116	-0.52814
8146159	AP3M2	6.22033	5.69223	-0.5281
7985918	NA	4.18069	3.65281	-0.52788
8046604	AGPS	9.65241	9.12455	-0.52786
7924190	ANGEL2	6.67871	6.15106	-0.52765
8050507	WDR35	5.21312	4.68562	-0.5275
8117377	HIST1H1E	11.9212	11.3938	-0.5274
7946678	NA	2.87557	2.3485	-0.52707
8140297	POM121C	10.0877	9.5607	-0.527
7916016	NA	3.78604	3.25905	-0.52699
7956097	SUOX	8.15033	7.62344	-0.52689
8002711	NA	9.04275	8.51591	-0.52684
8134211	C7orf64	7.57722	7.05057	-0.52665
8156110	NA	3.54814	3.0216	-0.52654
8168644	NA	9.02986	8.5039	-0.52596
8124196	DCDC2	9.89566	9.37023	-0.52543
8101675	ABCG2	11.106	10.5809	-0.5251
7993478	ABCC1	7.82244	7.29743	-0.52501
8004497	EIF4A1	11.2358	10.7108	-0.525
8110676	FLJ44896	4.77365	4.24906	-0.52459
7951032	SNORA1	4.75735	4.2328	-0.52455
7902913	CDC7	8.29235	7.76805	-0.5243
7958828	TRAFD1	7.93857	7.4143	-0.52427
8073032	TOMM22	9.61306	9.08897	-0.52409
7989277	MYO1E	7.73265	7.20878	-0.52387
8003298	SLC7A5	6.72817	6.20447	-0.5237
8150204	NA	9.55889	9.03532	-0.52357
8072529	DEPDC5	6.49415	5.97073	-0.52342
8063408	NA	3.0741	2.55076	-0.52334
7950067	DHCR7	9.46154	8.93865	-0.52289
8133275	POM121	9.9641	9.44125	-0.52285
7928489	NA	3.75377	3.23092	-0.52285
7936826	IKZF5	7.29853	6.77569	-0.52284
8028624	SAMD4B	8.43806	7.91539	-0.52267
8031047	MYADM	10.1096	9.58697	-0.52263
8083656	MFSD1	8.48055	7.95799	-0.52256
8127051	TRAM2	10.4035	9.88099	-0.52251
8000945	NA	6.80185	6.27962	-0.52223
8077595	BRPF1	7.00196	6.47974	-0.52222
8103415	FAM198B	10.4724	9.95027	-0.52213
7968199	CDK8	9.41309	8.89112	-0.52197
8010248	AFMID	7.61272	7.09091	-0.52181
7941296	SSSCA1	8.58191	8.06015	-0.52176
8013120	PEMT	7.28566	6.76469	-0.52097
8086148	NA	11.5779	11.057	-0.5209
8008087	NFE2L1	8.9753	8.45452	-0.52078
8064514	ZNF343	6.79359	6.27315	-0.52044
7899160	CD52	7.61672	7.09632	-0.5204
7966183	ALKBH2	7.84991	7.32955	-0.52036
8079693	WDR6	7.23842	6.71807	-0.52035
7947894	CELF1	8.68803	8.16791	-0.52012
7936856	CHST15	6.94711	6.42702	-0.52009
8053584	CD8A	6.063	5.54316	-0.51984
7933707	ZWINT	9.199	8.6792	-0.5198
7922889	IVNS1ABP	8.77736	8.25795	-0.51941
8030199	SNRNP70	9.38768	8.8683	-0.51938
7938291	SNORA3	6.23823	5.71918	-0.51905
8171373	GEMIN8	6.44387	5.9249	-0.51897
8019807	USP14	9.73281	9.21406	-0.51875
7986675	NIPA1	6.63883	6.12012	-0.51871
7932069	NUDT5	9.67598	9.15727	-0.51871
8014214	NLE1	7.21158	6.69336	-0.51822
8023415	TCF4	7.19342	6.67563	-0.51779
8170298	UBE2NL	7.71768	7.19992	-0.51776
8025728	QTRT1	6.70558	6.1879	-0.51768
7930703	TRUB1	8.59398	8.07631	-0.51767
7999233	GLYR1	9.85188	9.33428	-0.5176
8035177	SLC35E1	8.05663	7.53937	-0.51726
8013319	GRAP	4.58822	4.07099	-0.51723
8116921	EDN1	6.17455	5.65749	-0.51706
7953675	NANOG	6.12915	5.61219	-0.51696
8170990	SNORA36A	3.61226	3.09556	-0.5167
7907859	NA	5.85659	5.34017	-0.51642
8102848	SETD7	7.39085	6.87448	-0.51637
8083471	ARHGEF26	6.9115	6.39515	-0.51635
7962516	SLC38A1	8.90255	8.38624	-0.51631
8108403	MATR3	9.94436	9.42823	-0.51613
8149673	REEP4	8.17409	7.65799	-0.5161
8029814	PPP5C	8.28661	7.77061	-0.516
8024019	PTBP1	10.6593	10.1436	-0.5157
7979400	C14orf37	4.57762	4.06193	-0.51569
7930008	NOLC1	10.2812	9.76562	-0.51558
8079311	LARS2	7.9451	7.4296	-0.5155
7924307	NA	4.02386	3.50895	-0.51491
8072113	SRRD	7.53003	7.01631	-0.51372
7900167	CDCA8	8.80179	8.28816	-0.51363
8073513	CCDC134	7.4256	6.91219	-0.51341
8010963	NA	3.775	3.26176	-0.51324
7974249	ARF6	6.90672	6.39355	-0.51317
7997099	SF3B3	9.62419	9.11105	-0.51314
8093191	DLG1	9.92329	9.41015	-0.51314
8097480	NAA15	9.40282	8.88991	-0.51291
7990417	SCAMP2	10.5966	10.0842	-0.5124
8042801	DGUOK	9.13467	8.62242	-0.51225
8069508	NA	6.93485	6.4226	-0.51225
7931479	INPP5A	8.18138	7.66951	-0.51187
7929243	NHP2	9.06104	8.54933	-0.51171
8024792	EBI3	6.72819	6.21649	-0.5117
8070102	GART	9.32113	8.80948	-0.51165
8133326	POM121	10.6458	10.1342	-0.5116
7941382	KAT5	7.6802	7.16882	-0.51138
7977736	RAB2B	7.45871	6.94772	-0.51099
8018102	CPSF4L	4.86167	4.35087	-0.5108
8124967	BAT3	9.44084	8.93017	-0.51067
8112902	DHFR	9.64365	9.133	-0.51065
7928630	EIF5AL1	10.959	10.4499	-0.5091
7909768	SPATA17	5.96689	5.45816	-0.50873
8157283	PRPF4	9.15399	8.64537	-0.50862
8078916	SNORA6	6.12849	5.6202	-0.50829
7940798	MARK2	8.14863	7.64047	-0.50816
8018731	RHBDF2	6.47956	5.97146	-0.5081
8152764	MTSS1	8.94809	8.44002	-0.50807
8173912	RPSAP15	8.47034	7.9623	-0.50804
7944401	HMBS	7.86851	7.36059	-0.50792
7905198	TARS2	7.36239	6.85458	-0.50781
8151306	NA	4.1749	3.66737	-0.50753
7966462	NAA25	8.53292	8.02585	-0.50707
7934753	EIF5AL1	10.9305	10.4235	-0.507
7986767	NA	5.31491	4.80807	-0.50684
8144719	NA	2.60619	2.09956	-0.50663
7939341	CD44	9.53802	9.03167	-0.50635
8031762	ZNF549	5.12583	4.61963	-0.5062
8162533	PTCH1	6.22513	5.71897	-0.50616
8146171	IKBKB	6.37963	5.87347	-0.50616
7977241	INF2	7.81885	7.31298	-0.50587
8099107	LYAR	8.98149	8.47571	-0.50578
8123651	TUBB2B	9.78198	9.2763	-0.50568
7941702	RBM14	6.38177	5.87624	-0.50553
7920687	GBAP1	4.8634	4.35793	-0.50547
8003263	ZCCHC14	6.23482	5.72948	-0.50534
7896822	AGRN	8.6112	8.10588	-0.50532
8064351	CSNK2A1	10.8782	10.3729	-0.5053
8004144	MIS12	8.24948	7.74443	-0.50505
8169061	PLP1	12.1973	11.6924	-0.5049
8064438	NSFL1C	9.62356	9.11934	-0.50422
7925174	TOMM20	10.7133	10.2091	-0.5042
8150175	C8orf41	6.04051	5.53656	-0.50395
8071301	C22orf25	6.96499	6.46188	-0.50311
8119689	PTK7	8.78038	8.27738	-0.503
8050608	C2orf43	6.49889	5.99593	-0.50296
8014700	C17orf96	6.81595	6.31331	-0.50264
8059852	MSL3L2	6.43778	5.93514	-0.50264
7948534	DDB1	9.30447	8.80191	-0.50256
7938331	ZNF143	7.71313	7.21071	-0.50242
8016523	GIP	6.55467	6.05238	-0.50229
8065254	NA	10.6603	10.1581	-0.5022
7952341	ASAM	9.53257	9.03071	-0.50186
7981525	CDCA4	7.82724	7.32549	-0.50175
8114861	LARS	10.3379	9.83655	-0.50135
8142770	NA	7.04553	6.54465	-0.50088
8034454	DHPS	8.12542	7.62494	-0.50048
8031825	ZNF552	7.72943	7.22901	-0.50042
8020495	CABLES1	7.04884	6.54847	-0.50037
7911355	TUBB8	8.5175	8.01728	-0.50022
7949364	CDCA5	8.67538	8.17551	-0.49987
8115076	CSF1R	6.40978	5.9106	-0.49918
8062576	DHX35	6.72889	6.22975	-0.49914
7911108	NA	5.10603	4.60693	-0.4991
8159854	KIAA0020	8.65928	8.16033	-0.49895
8132539	DBNL	7.86118	7.36242	-0.49876
7999112	PAM16	9.56407	9.06549	-0.49858
8077781	VHL	6.5957	6.09718	-0.49852
7939329	PDHX	8.96777	8.46925	-0.49852
7985997	NA	6.35643	5.85853	-0.4979
8117696	COX11	7.47845	6.98065	-0.4978
8102875	NA	5.38696	4.88926	-0.4977
8097827	NA	6.40673	5.90917	-0.49756
8042119	PAPOLG	8.24049	7.74296	-0.49753
8002660	TXNL4B	8.18677	7.68929	-0.49748
8075343	SF3A1	9.26859	8.77112	-0.49747
8121749	GJA1	10.0566	9.5592	-0.4974
7899615	SERINC2	9.85954	9.36234	-0.4972
7982938	TYRO3	8.33727	7.84011	-0.49716
8139113	NA	4.58619	4.08916	-0.49703
7910913	NA	5.57435	5.0775	-0.49685
8126058	PPIL1	8.15452	7.65767	-0.49685
7914851	CLSPN	7.70864	7.21214	-0.4965
8074632	KLHL22	6.90991	6.41363	-0.49628
8021150	IER3IP1	4.46026	3.96407	-0.49619
7922416	SNORD75	6.53607	6.03998	-0.49609
8139935	TYW1B	6.01007	5.51421	-0.49586
8145702	WRN	6.84592	6.35031	-0.49561
7911566	NA	5.66645	5.17105	-0.4954
8039945	NA	5.66645	5.17105	-0.4954
7992594	CCNF	7.80841	7.31312	-0.49529
8059712	SNORD82	5.88917	5.39406	-0.49511
8043187	MAT2A	10.2685	9.77367	-0.49483
7919645	SV2A	8.11271	7.61789	-0.49482
8086899	NME6	7.25095	6.7563	-0.49465
7918275	WDR47	6.47904	5.98446	-0.49458
8103485	NAF1	6.83763	6.34324	-0.49439
7955787	SP1	9.62343	9.1293	-0.49413
8091099	NA	5.52315	5.02915	-0.494
8164006	NA	2.98736	2.49339	-0.49397
8150846	TMEM68	6.30077	5.80703	-0.49374
8012166	NEURL4	6.30745	5.81383	-0.49362
8112894	NA	4.74539	4.25182	-0.49357
8126512	MRPL2	8.53007	8.03651	-0.49356
7933145	NA	4.73136	4.23784	-0.49352
7922250	SCYL3	5.98833	5.49483	-0.4935
8087806	PCBP4	6.88115	6.38773	-0.49342
8147447	PTDSS1	8.0346	7.54123	-0.49337
8159337	PMPCA	8.93422	8.441	-0.49322
8117395	HIST1H2BF	8.08429	7.5913	-0.49299
8063835	LSM14B	7.31925	6.82636	-0.49289
7961489	WBP11	10.4103	9.91751	-0.49279
8017840	C17orf58	6.4405	5.94802	-0.49248
8117929	ABCF1	9.61299	9.12075	-0.49224
8177797	ABCF1	9.61299	9.12075	-0.49224
8179112	ABCF1	9.61299	9.12075	-0.49224
8117077	NA	4.68522	4.19321	-0.49201
8152133	RRM2B	7.80423	7.31243	-0.4918
8006736	DUSP14	7.62201	7.13061	-0.4914
8133345	WBSCR22	9.47009	8.97882	-0.49127
7920707	FAM189B	7.98255	7.49176	-0.49079
8097647	ABCE1	9.14173	8.65117	-0.49056
7912525	NA	3.56185	3.07136	-0.49049
7961569	NA	4.85492	4.36456	-0.49036
8171381	FANCB	6.27749	5.78739	-0.4901
8130185	ZBTB2	7.4347	6.94475	-0.48995
7952274	PVRL1	5.75075	5.26081	-0.48994
8054580	BUB1	9.51832	9.02845	-0.48987
7945283	ACAD8	6.79995	6.31026	-0.48969
8044933	GLI2	5.13511	4.6459	-0.48921
8106573	THBS4	5.64609	5.15691	-0.48918
8007902	NA	4.3627	3.87358	-0.48912
8104656	LOC729862	4.75807	4.26902	-0.48905
8153727	CPSF1	7.98603	7.49705	-0.48898
8013331	B9D1	7.58268	7.09397	-0.48871
8162236	SEMA4D	7.87725	7.38868	-0.48857
7900911	DPH2	6.80557	6.3171	-0.48847
7920401	SLC39A1	7.15959	6.67113	-0.48846
7909689	SMYD2	7.82431	7.3359	-0.48841
8139244	C7orf44	10.6439	10.1555	-0.4884
8054465	NA	5.24285	4.75453	-0.48832
7920737	CLK2	8.19577	7.70772	-0.48805
8053187	PCGF1	8.19608	7.7082	-0.48788
7915227	SNORA55	5.8953	5.40758	-0.48772
8059139	ATG9A	8.46859	7.98125	-0.48734
7911862	LRRC47	8.57561	8.08848	-0.48713
8168691	DIAPH2	6.96533	6.47825	-0.48708
7999362	NA	6.40031	5.91325	-0.48706
8145259	CHMP7	6.81755	6.33095	-0.4866
7968029	PCOTH	4.71795	4.23156	-0.48639
8149365	FAM86B1	8.30596	7.81965	-0.48631
8056728	NA	7.71044	7.2242	-0.48624
8042381	PNO1	8.61732	8.1312	-0.48612
8135915	C7orf68	7.78147	7.29561	-0.48586
8141283	PTCD1	8.38359	7.89812	-0.48547
8081219	ST3GAL6	8.03147	7.54603	-0.48544
8019046	EIF4A3	9.39289	8.90762	-0.48527
7904158	OLFML3	6.78541	6.30034	-0.48507
8064522	IDH3B	9.70005	9.21517	-0.48488
7956401	SHMT2	11.2051	10.7203	-0.4848
8020349	NA	4.49077	4.00606	-0.48471
8094271	MED28	9.72982	9.24541	-0.48441
7942289	RNF121	7.63486	7.15051	-0.48435
7985119	HMG20A	8.30504	7.82077	-0.48427
8080100	RAD54L2	7.71014	7.22591	-0.48423
7982206	GOLGA8IP	7.15662	6.67255	-0.48407
8025563	PPAN-P2RY11	7.68573	7.20174	-0.48399
8103524	TMEM192	6.98717	6.50318	-0.48399
8014755	SNORA21	7.33557	6.85185	-0.48372
8140151	RFC2	9.97042	9.48683	-0.48359
7939465	HSD17B12	9.31188	8.82837	-0.48351
8151824	RAD54B	8.47213	7.98871	-0.48342
7940840	OTUB1	9.40988	8.92697	-0.48291
8004030	RNF167	9.20289	8.72004	-0.48285
7968234	SNORA27	5.99877	5.51598	-0.48279
8020382	NA	8.09222	7.60957	-0.48265
7955361	LARP4	10.0069	9.52433	-0.48257
8026982	MPV17L2	9.44195	8.95941	-0.48254
7936408	DCLRE1A	6.88885	6.40654	-0.48231
8021113	C18orf25	7.11052	6.6285	-0.48202
8063636	STX16	8.81985	8.33792	-0.48193
8158112	CDK9	8.80025	8.31832	-0.48193
7941164	MRPL49	6.95643	6.47457	-0.48186
8050240	ODC1	11.1866	10.7048	-0.4818
7921228	ETV3	6.63435	6.15262	-0.48173
8177046	NA	6.71742	6.23619	-0.48123
7950983	CHORDC1	9.22998	8.74877	-0.48121
8017150	TUBD1	8.34848	7.86746	-0.48102
8137874	CARD11	8.23691	7.75602	-0.48089
8108558	SLC35A4	8.6191	8.13859	-0.48051
8136981	NA	3.00191	2.52158	-0.48033
8015503	ZNF385C	7.05573	6.57562	-0.48011
8007071	CDC6	10.3142	9.83437	-0.47983
8058985	RNF25	7.22187	6.74207	-0.4798
8057736	TMEM194B	3.94174	3.46237	-0.47937
7985829	FANCI	8.53191	8.05266	-0.47925
8005064	ARHGAP44	5.23024	4.75102	-0.47922
8104378	PAPD7	7.76209	7.28306	-0.47903
7996744	NFATC3	8.09903	7.6202	-0.47883
8013536	NOS2	6.75668	6.27793	-0.47875
7959298	TMEM120B	6.89461	6.41586	-0.47875
8152280	LRP12	5.75279	5.27408	-0.47871
8069003	PWP2	7.08697	6.60839	-0.47858
8067167	AURKA	10.94	10.4616	-0.4784
8054364	TGFBRAP1	7.32738	6.84917	-0.47821
8023735	TMX3	7.20135	6.72344	-0.47791
7972840	TUBGCP3	7.336	6.85813	-0.47787
8009755	ARMC7	6.24447	5.76663	-0.47784
8062041	ACSS2	9.51757	9.0399	-0.47767
7963157	RACGAP1	9.874	9.39637	-0.47763
7996934	NIP7	9.22629	8.74889	-0.4774
8109819	FBLL1	5.80691	5.32962	-0.47729
8049271	ATG16L1	7.02712	6.54985	-0.47727
8102728	NA	7.08051	6.60327	-0.47724
8060339	NRSN2	8.95626	8.47904	-0.47722
8040985	ZNF512	8.97627	8.49956	-0.47671
7999903	C16orf88	9.89616	9.4196	-0.47656
8116651	NA	11.0976	10.6211	-0.4765
7924119	INTS7	7.62669	7.15045	-0.47624
8167871	NA	3.08058	2.60443	-0.47615
7925229	B3GALNT2	9.25274	8.7766	-0.47614
7899253	ZDHHC18	8.68863	8.21251	-0.47612
8106504	BHMT	5.49455	5.01851	-0.47604
7992756	NA	3.04569	2.57004	-0.47565
7963064	MCRS1	7.7518	7.27626	-0.47554
8065868	EIF6	10.2978	9.82228	-0.47552
8140955	CDK6	9.91534	9.44008	-0.47526
8109368	G3BP1	10.9555	10.4803	-0.4752
8170418	NA	6.06093	5.58606	-0.47487
8079772	APEH	10.3948	9.92012	-0.47468
8049934	GAL3ST2	8.38042	7.90589	-0.47453
7899167	LIN28A	10.8424	10.368	-0.4744
8018297	NT5C	7.9171	7.44282	-0.47428
8044278	CCDC138	6.14497	5.67093	-0.47404
8143766	ACTR3C	4.78328	4.30926	-0.47402
8050071	ADI1	7.72442	7.25056	-0.47386
8024358	CSNK1G2	7.66816	7.19479	-0.47337
8172028	NA	7.6252	7.15192	-0.47328
8102779	NA	3.74081	3.2676	-0.47321
8025584	SNORD105	3.79387	3.32067	-0.4732
8058333	NA	6.68044	6.20757	-0.47287
8176395	NA	9.19827	8.7256	-0.47267
7954985	TMEM117	6.22967	5.75704	-0.47263
8018823	TMC6	6.43222	5.95969	-0.47253
7982663	BUB1B	8.90089	8.4284	-0.47249
8107655	CSNK1G3	8.45077	7.97831	-0.47246
8011599	ANKFY1	6.86419	6.39222	-0.47197
7920725	SCAMP3	8.52748	8.05554	-0.47194
8034315	ZNF823	6.60277	6.13085	-0.47192
8029856	GRLF1	9.62654	9.15474	-0.4718
8036010	PEPD	8.65543	8.18386	-0.47157
8029321	ZNF283	6.30173	5.83032	-0.47141
7906574	SUMO1P3	3.99783	3.52665	-0.47118
7966229	MGC14436	3.43374	2.96257	-0.47117
8106122	TNPO1	9.89564	9.42457	-0.47107
7951838	ZNF259	9.48859	9.01757	-0.47102
8039779	SLC27A5	5.85403	5.38324	-0.47079
8002778	MLKL	5.27075	4.80012	-0.47063
8126653	MRPL14	9.82635	9.35578	-0.47057
7998222	MRPL28	9.37551	8.90533	-0.47018
8148208	FAM91A1	7.7621	7.29193	-0.47017
8075798	EIF3D	10.6625	10.1924	-0.4701
8034754	SAMD1	7.23043	6.76034	-0.47009
8074817	TOP3B	6.91764	6.44789	-0.46975
7906307	KIRREL	7.23755	6.76786	-0.46969
7982000	SNORD116-26	5.1828	4.71314	-0.46966
7952145	HYOU1	9.24641	8.77684	-0.46957
7901054	PLK3	6.23735	5.76785	-0.4695
7928308	DDIT4	7.516	7.0466	-0.4694
8128034	AKIRIN2	10.0839	9.61468	-0.46922
8124527	HIST1H1B	10.2877	9.81888	-0.46882
7964250	PTGES3	11.3192	10.8504	-0.4688
8114797	SPRY4	8.98106	8.51236	-0.4687
8137596	UBE3C	9.10611	8.63743	-0.46868
8128282	NA	3.61855	3.14993	-0.46862
8121588	DSE	6.7556	6.28705	-0.46855
8005955	SNORD42A	5.09351	4.62505	-0.46846
8090193	HEG1	7.76702	7.29872	-0.4683
8006984	PSMD3	10.0449	9.57661	-0.46829
8007397	PSME3	10.2338	9.76581	-0.46799
7917468	NA	4.2011	3.73336	-0.46774
7956443	MARS	10.2467	9.77911	-0.46759
7898894	C1orf128	7.96857	7.50112	-0.46745
8026315	PKN1	8.37659	7.90917	-0.46742
7961964	C12orf11	8.96191	8.49451	-0.4674
8090490	RPN1	10.5559	10.0886	-0.4673
8080773	RPP14	8.15279	7.68579	-0.467
7950990	SLC36A4	6.67486	6.20836	-0.4665
8131044	GET4	8.41354	7.94718	-0.46636
7956826	TBC1D30	5.75562	5.28928	-0.46634
8139392	DDX56	9.27135	8.80542	-0.46593
8042402	APLF	7.56906	7.10352	-0.46554
8095269	POLR2B	10.0214	9.55605	-0.46535
7924405	RAB3GAP2	8.23304	7.76772	-0.46532
7932243	FAM171A1	8.059	7.59394	-0.46506
8069574	C21orf91	5.72607	5.26106	-0.46501
8024584	NCLN	7.7171	7.25233	-0.46477
8135268	EIF4B	11.8275	11.3628	-0.4647
7985134	IDH3A	8.53795	8.07327	-0.46468
8170882	ATP6AP1	10.2846	9.81992	-0.46468
8142930	TSGA14	7.01788	6.55323	-0.46465
8074773	YDJC	7.58601	7.12143	-0.46458
8094830	TMEM33	8.61305	8.1486	-0.46445
8081740	ATP6V1A	8.85911	8.39487	-0.46424
8028916	SNRPA	10.3117	9.84789	-0.46381
8067773	ZNF512B	5.90259	5.43885	-0.46374
7967736	POLE	7.54814	7.08455	-0.46359
7928444	VCL	9.08527	8.62203	-0.46324
7938313	IPO7	10.4631	9.99998	-0.46312
8015545	RAB5C	10.279	9.81598	-0.46302
8000003	THUMPD1	8.16216	7.69925	-0.46291
7977075	SNORA28	6.69019	6.22748	-0.46271
8031908	ZSCAN22	6.08407	5.62195	-0.46212
7983335	CTDSPL2	8.31789	7.85602	-0.46187
7941900	RPS6KB2	8.09764	7.63581	-0.46183
8073062	APOBEC3B	8.75719	8.2955	-0.46169
8130032	FBXO30	9.32892	8.86743	-0.46149
8077376	ITPR1	5.56187	5.10044	-0.46143
7916316	TMEM48	9.6089	9.14759	-0.46131
8141107	SLC25A13	10.1395	9.67831	-0.46119
7964145	TIMELESS	8.37482	7.91364	-0.46118
7982358	ARHGAP11A	8.14053	7.67949	-0.46104
7906443	FCER1A	3.95797	3.49696	-0.46101
8108420	SNORA74A	5.15471	4.69374	-0.46097
8118721	ZBTB9	6.02809	5.5672	-0.46089
7937518	TSPAN4	7.87871	7.4179	-0.46081
8144153	NCAPG2	8.36578	7.90566	-0.46012
7917276	LPAR3	4.63059	4.1705	-0.46009
7903786	CSF1	6.94331	6.48325	-0.46006
7942279	FAM86C	6.99945	6.53942	-0.46003
8103399	PDGFC	7.82659	7.36658	-0.46001
8038624	C19orf48	7.16979	6.70982	-0.45997
7997633	USP10	8.64322	8.18331	-0.45991
8138067	CYTH3	6.80898	6.3495	-0.45948
8063386	CEBPB	6.97688	6.51753	-0.45935
7945979	TRIM68	6.19661	5.73732	-0.45929
8170443	MTMR1	6.72408	6.26492	-0.45916
8089034	ARMC10	7.65802	7.19899	-0.45903
7981364	CINP	6.94759	6.48858	-0.45901
8003922	MED11	7.98905	7.53005	-0.459
7985757	MRPS11	9.11698	8.65816	-0.45882
7922610	ABL2	6.44734	5.98874	-0.4586
8174253	MORF4L2	11.6722	11.2137	-0.4585
7905079	HIST2H2AA3	10.4776	10.0191	-0.4585
7919619	HIST2H2AA3	10.4776	10.0191	-0.4585
8033300	GPR108	8.61965	8.16122	-0.45843
7947110	E2F8	7.84601	7.38797	-0.45804
8123340	NA	4.62281	4.16492	-0.45789
8066200	TTI1	8.8021	8.34427	-0.45783
7938295	RPL27A	9.30085	8.84303	-0.45782
7951351	PDGFD	5.18608	4.72833	-0.45775
8125671	WDR46	7.77641	7.31923	-0.45718
8178939	WDR46	7.77641	7.31923	-0.45718
8049582	SCLY	7.14837	6.69128	-0.45709
8096296	HSP90AB3P	8.73263	8.27583	-0.4568
7910997	EXO1	7.76956	7.31279	-0.45677
8154635	MTAP	6.98899	6.53225	-0.45674
8027650	UBA2	9.07132	8.61467	-0.45665
8171352	TRAPPC2	5.10919	4.65259	-0.4566
7994341	NA	4.13657	3.68	-0.45657
8150101	NA	6.93512	6.47881	-0.45631
8128043	CNR1	4.34566	3.88942	-0.45624
8171684	SH3KBP1	9.59695	9.14103	-0.45592
7940857	STIP1	10.759	10.3031	-0.4559
7925996	FBXO18	7.9321	7.47651	-0.45559
8085716	SATB1	7.81844	7.36286	-0.45558
8022882	ZNF24	7.81713	7.36158	-0.45555
7898732	NA	3.72585	3.27032	-0.45553
8160297	PLIN2	9.6004	9.14503	-0.45537
7972867	PCID2	8.29267	7.83764	-0.45503
8127989	SNORD50B	7.31376	6.85928	-0.45448
8011747	SLC25A11	9.10512	8.65084	-0.45428
8112312	DIMT1L	7.53408	7.07981	-0.45427
8038532	IZUMO2	4.5945	4.1404	-0.4541
8070557	ZNF295	6.57899	6.1251	-0.45389
8164696	NA	6.40581	5.952	-0.45381
8076339	PHF5A	8.13787	7.68412	-0.45375
8162449	ZNF484	6.28308	5.82936	-0.45372
8169056	TMEM31	6.68251	6.22887	-0.45364
8073430	ACO2	8.81729	8.36374	-0.45355
8006531	SLFN5	4.61191	4.15849	-0.45342
7918757	DENND2C	3.75562	3.30223	-0.45339
7971367	NA	3.01118	2.55783	-0.45335
7956105	IKZF4	6.98695	6.53459	-0.45236
8168886	NA	3.33988	2.88753	-0.45235
8045205	LOC150527	3.23023	2.77809	-0.45214
8055236	LOC150527	3.23023	2.77809	-0.45214
7962085	IPO8	8.67296	8.22096	-0.452
8119169	TBC1D22B	6.68169	6.22984	-0.45185
8015037	SMARCE1	4.22002	3.76833	-0.45169
8047518	NOP58	10.3174	9.86592	-0.45148
8006502	NA	3.49927	3.04779	-0.45148
8079733	KLHDC8B	6.26264	5.81125	-0.45139
7915504	ELOVL1	9.79698	9.34572	-0.45126
8050766	ADCY3	8.91549	8.46424	-0.45125
8075406	PES1	8.07086	7.61976	-0.4511
8036318	ZNF566	4.86964	4.41859	-0.45105
8053107	DCTN1	9.09321	8.64223	-0.45098
7981859	GOLGA8IP	6.75476	6.30383	-0.45093
7954065	GPRC5A	6.87746	6.42663	-0.45083
8090469	GATA2	6.71849	6.26792	-0.45057
8012197	PLSCR3	6.51009	6.06	-0.45009
7996341	PDP2	6.72292	6.27285	-0.45007
7950743	RAB30	6.03767	5.58771	-0.44996
7967072	COQ5	9.96094	9.51114	-0.4498
8037537	ERCC2	8.31018	7.86041	-0.44977
8088264	IL17RD	6.96551	6.5158	-0.44971
7993071	ALG1	8.75986	8.31019	-0.44967
8063509	C20orf43	9.55145	9.10181	-0.44964
7950683	NARS2	7.65556	7.20635	-0.44921
7996198	CCDC113	6.33214	5.88299	-0.44915
8040908	SNX17	9.22127	8.77236	-0.44891
8073612	TSPO	7.73587	7.28697	-0.4489
7980891	TC2N	6.28723	5.83837	-0.44886
7953135	TULP3	9.0782	8.6294	-0.4488
8053890	STARD7	10.9713	10.5225	-0.4488
8077550	MTMR14	8.3875	7.93872	-0.44878
8076851	ALG12	7.93988	7.49182	-0.44806
7965486	CCDC41	6.53694	6.08891	-0.44803
7949060	PPP1R14B	9.57579	9.1278	-0.44799
7975645	ZNF410	7.34107	6.89318	-0.44789
7957023	LYZ	5.77706	5.32918	-0.44788
8016870	MRPS23	9.83578	9.3886	-0.44718
8112841	HOMER1	8.09339	7.64638	-0.44701
8067709	GMEB2	7.05639	6.60956	-0.44683
7982753	RPUSD2	6.58636	6.13956	-0.4468
8146859	NA	3.65871	3.21209	-0.44662
7899519	YTHDF2	7.5271	7.08074	-0.44636
7921571	PEX19	8.81628	8.37029	-0.44599
8064894	LRRN4	6.18791	5.74219	-0.44572
8036777	FBL	11.5246	11.0791	-0.4455
7941707	RBM14	6.2405	5.79507	-0.44543
8071392	MED15	9.2281	8.78267	-0.44543
7899774	HDAC1	10.6165	10.1712	-0.4453
8000848	CD2BP2	7.66593	7.22088	-0.44505
8164067	PSMB7	11.3002	10.8553	-0.4449
7937508	CD151	9.63753	9.19269	-0.44484
8113602	CCDC112	4.58012	4.1358	-0.44432
7919578	GSTM2	5.95845	5.5142	-0.44425
8048699	NA	5.73292	5.28875	-0.44417
8001750	SLC38A7	6.34598	5.90227	-0.44371
8013633	UNC119	7.84361	7.40003	-0.44358
8028524	ACTN4	11.2944	10.8509	-0.4435
7995755	OGFOD1	7.98153	7.53826	-0.44327
7903935	LOC149620	4.02366	3.58045	-0.44321
8064014	SLC17A9	7.35041	6.90737	-0.44304
7990090	NA	10.0798	9.63676	-0.44304
8104234	TRIP13	9.00334	8.56034	-0.443
7918747	DENND2C	3.675	3.2321	-0.4429
7907466	DARS2	8.65768	8.21503	-0.44265
8017344	LOC100129112	5.29489	4.85302	-0.44187
7956908	NA	6.17791	5.73632	-0.44159
8069744	RWDD2B	9.80583	9.36429	-0.44154
7945321	GLB1L2	6.14131	5.69982	-0.44149
8073379	L3MBTL2	6.8285	6.38701	-0.44149
8133413	LIMK1	8.37072	7.92953	-0.44119
8127109	ICK	7.38419	6.94303	-0.44116
8143747	NA	2.79505	2.35396	-0.44109
7986947	GOLGA8IP	6.93209	6.49102	-0.44107
7934178	PCBD1	10.5149	10.0747	-0.4402
8005512	PRPSAP2	8.15666	7.71646	-0.4402
8180123	VPS52	8.54713	8.10721	-0.43992
8064739	C20orf27	6.63109	6.19118	-0.43991
7928600	EIF5AL1	10.8958	10.4559	-0.4399
8144880	SH2D4A	6.87428	6.43443	-0.43985
8143714	ZNF777	6.46865	6.02903	-0.43962
7963244	TFCP2	8.62653	8.18703	-0.4395
8122265	TNFAIP3	6.50579	6.06657	-0.43922
7915091	MTF1	7.88013	7.44094	-0.43919
8161249	MCART1	4.97433	4.53515	-0.43918
8043725	ZAP70	5.70441	5.26525	-0.43916
8175052	AIFM1	9.5452	9.10623	-0.43897
7947332	IMMP1L	4.53134	4.09241	-0.43893
7912086	NOL9	8.52743	8.08853	-0.4389
7901046	SNORD55	5.75111	5.31221	-0.4389
7908022	DHX9	9.42717	8.98835	-0.43882
8047069	INPP1	7.3805	6.94183	-0.43867
8172471	PIM2	7.07669	6.63815	-0.43854
8157193	ZNF483	5.89504	5.45657	-0.43847
7967588	DHX37	6.24351	5.8051	-0.43841
7996051	POLR2C	8.28504	7.84672	-0.43832
7979931	MED6	8.73031	8.2921	-0.43821
8121685	DCBLD1	7.87194	7.43401	-0.43793
8107769	SLC12A2	9.99923	9.56137	-0.43786
7934278	P4HA1	8.45291	8.01523	-0.43768
8012054	DLG4	4.74053	4.3029	-0.43763
7999608	RRN3	7.46111	7.0238	-0.43731
7935865	POLL	6.67095	6.23379	-0.43716
7997962	DPEP1	6.70083	6.26374	-0.43709
8145136	PPP3CC	6.14421	5.70737	-0.43684
8008139	UBE2Z	10.5473	10.1105	-0.4368
8023561	LMAN1	9.73401	9.29722	-0.43679
7924150	TMEM206	6.96286	6.52611	-0.43675
8075585	C22orf28	10.5877	10.151	-0.4367
8120826	IRAK1BP1	6.03155	5.59486	-0.43669
8173430	SNX12	8.5209	8.08436	-0.43654
7963567	KRT8	12.6948	12.2586	-0.4362
8112959	NA	4.91656	4.48039	-0.43617
7905700	UBAP2L	10.4638	10.0278	-0.436
8167103	CDK16	10.0104	9.57441	-0.43599
7998129	POLR3K	9.91364	9.47789	-0.43575
7992414	TBL3	6.4023	5.96676	-0.43554
7925320	NID1	9.99425	9.55872	-0.43553
8030035	GRWD1	7.63084	7.19535	-0.43549
8073192	UQCRFS1	9.95808	9.52264	-0.43544
7924450	DUSP10	6.20057	5.76515	-0.43542
8117809	HCG9	4.19049	3.75507	-0.43542
8177740	HCG9	4.19049	3.75507	-0.43542
7942007	LRP5	6.91675	6.48154	-0.43521
7958019	DRAM1	7.7543	7.31914	-0.43516
8137474	ACTR3B	8.44059	8.00546	-0.43513
7915485	EBNA1BP2	9.887	9.45237	-0.43463
7959921	LOC338797	5.50571	5.07114	-0.43457
8000884	DCTPP1	9.05813	8.62393	-0.4342
8043682	NA	6.47725	6.0431	-0.43415
7967039	MSI1	8.34525	7.91136	-0.43389
8004167	FAM64A	7.34521	6.91139	-0.43382
7959604	DDX55	8.37018	7.93664	-0.43354
7927082	HSD17B7P2	7.9472	7.51371	-0.43349
8060205	PASK	6.34107	5.90789	-0.43318
8116760	RIOK1	9.10626	8.6731	-0.43316
7954604	KLHDC5	6.57745	6.14435	-0.4331
8160835	C9orf23	8.23011	7.79703	-0.43308
7998103	GAS8	6.43243	5.99949	-0.43294
8056753	METTL8	7.01996	6.58702	-0.43294
8151496	ZNF704	5.86477	5.43196	-0.43281
7932023	USP6NL	8.80677	8.374	-0.43277
8177222	CD24	8.84438	8.41162	-0.43276
8047174	SLC39A10	7.3498	6.91708	-0.43272
8087925	TNNC1	9.15347	8.72076	-0.43271
8000425	GTF3C1	7.80173	7.36927	-0.43246
8132964	SUMF2	8.62576	8.19353	-0.43223
8098177	KLHL2	6.93643	6.50442	-0.43201
7918569	ST7L	6.24361	5.81175	-0.43186
8033392	XAB2	8.10612	7.67429	-0.43183
7991401	HDDC3	8.54283	8.11108	-0.43175
7928589	PPIF	9.56086	9.1293	-0.43156
8061542	HM13	9.43369	9.00219	-0.4315
7957503	C12orf37	4.17554	3.7441	-0.43144
8090162	ITGB5	8.20274	7.77133	-0.43141
8059319	FARSB	9.63227	9.20142	-0.43085
8047038	PMS1	7.75639	7.32582	-0.43057
8089677	NA	7.01207	6.58171	-0.43036
7905395	PSMB4	11.6344	11.2042	-0.4302
8170362	NA	3.66121	3.23112	-0.43009
7975095	PLEKHG3	6.06116	5.63108	-0.43008
7928909	FAM35A	7.36935	6.93979	-0.42956
7898002	PRAMEF22	4.15606	3.72651	-0.42955
8034806	DDX39	8.91557	8.48626	-0.42931
7971361	NUFIP1	9.03961	8.61031	-0.4293
8000284	GGA2	8.9114	8.48232	-0.42908
8158212	NA	6.32564	5.89668	-0.42896
8031712	ZNF805	6.68284	6.25391	-0.42893
8050689	C2orf44	8.39879	7.96995	-0.42884
7898549	MRTO4	8.61001	8.18136	-0.42865
7981972	SNORD116-12	3.5991	3.17051	-0.42859
8026250	DCAF15	7.69395	7.26539	-0.42856
8093112	UBXN7	9.08352	8.6552	-0.42832
8070988	MCM3AP	8.0089	7.58075	-0.42815
7940051	ZDHHC5	8.29386	7.86587	-0.42799
8046276	SP5	7.14191	6.71416	-0.42775
8164336	DPM2	7.078	6.6503	-0.4277
8124622	ZNF311	3.6789	3.2513	-0.4276
8178275	ZNF311	3.6789	3.2513	-0.4276
7936322	GPAM	9.48603	9.05853	-0.4275
7906372	OR10Z1	4.37215	3.94469	-0.42746
8129985	PLAGL1	6.35801	5.93082	-0.42719
7923824	SLC41A1	8.32912	7.9023	-0.42682
7975863	C14orf118	7.63313	7.20644	-0.42669
8082314	PLXNA1	7.89781	7.47126	-0.42655
8036460	DPF1	5.3069	4.88036	-0.42654
7941639	BBS1	7.0073	6.5809	-0.4264
7918424	NA	6.86178	6.4354	-0.42638
8011275	METT10D	6.72401	6.29788	-0.42613
8034379	ZNF442	5.79661	5.37051	-0.4261
8059277	NA	4.61339	4.18764	-0.42575
8034101	TMED1	7.02374	6.59799	-0.42575
8032730	EEF2	11.601	11.1754	-0.4256
7955865	HOXC9	5.7265	5.30096	-0.42554
8090591	PLXND1	7.85272	7.42719	-0.42553
8003116	HSDL1	7.91111	7.48578	-0.42533
8131381	ANKRD61	4.64422	4.21891	-0.42531
7935230	ALDH18A1	9.78074	9.3556	-0.42514
7919940	VPS72	8.89872	8.47369	-0.42503
7990361	UBL7	8.77744	8.35242	-0.42502
8134992	SRRT	8.95243	8.52773	-0.4247
8122174	NA	5.28116	4.8565	-0.42466
8155327	ALDH1B1	10.1931	9.76853	-0.42457
8075089	TFIP11	7.83125	7.40671	-0.42454
8070819	PTTG1IP	10.7495	10.325	-0.4245
8037205	CEACAM1	8.53877	8.11443	-0.42434
8158164	LOC389791	3.34085	2.91668	-0.42417
8097128	EXOSC9	8.38838	7.96446	-0.42392
7900922	ATP6V0B	9.05154	8.62768	-0.42386
8023259	SNORD58A	5.35273	4.92898	-0.42375
7944493	CBL	7.99674	7.573	-0.42374
8040655	EPT1	9.73622	9.31248	-0.42374
8004832	RANGRF	7.84049	7.41683	-0.42366
7980271	NEK9	7.05197	6.6285	-0.42347
8152582	DSCC1	8.23048	7.80702	-0.42346
8088718	UBA3	8.97837	8.55512	-0.42325
8075310	LIF	5.45273	5.02963	-0.4231
8077511	NA	3.41875	2.99566	-0.42309
8169272	ATG4A	6.06544	5.64242	-0.42302
7972713	EFNB2	8.27125	7.84835	-0.4229
8051928	PREPL	8.7531	8.33022	-0.42288
8120335	FAM83B	6.48797	6.06521	-0.42276
7906467	NA	4.31519	3.89246	-0.42273
8018209	NAT9	7.50451	7.08185	-0.42266
8174201	BEX1	4.61053	4.18794	-0.42259
8040578	CENPO	9.88825	9.46583	-0.42242
8077731	FANCD2	7.9625	7.54015	-0.42235
8038407	RRAS	6.50916	6.08691	-0.42225
7956785	XPOT	9.67501	9.2528	-0.42221
8140782	ABCB1	5.00687	4.58467	-0.4222
8071713	FBXW4P1	6.16116	5.739	-0.42216
7925672	ZNF670	7.34126	6.91935	-0.42191
7899043	SEPN1	9.20696	8.78524	-0.42172
8124524	HIST1H2AK	9.06584	8.64425	-0.42159
7990345	SEMA7A	8.00346	7.58188	-0.42158
8127419	NA	7.97535	7.55385	-0.4215
8049544	LRRFIP1	7.3964	6.97528	-0.42112
8084397	ECE2	6.9716	6.55053	-0.42107
7914141	RPA2	8.2399	7.81888	-0.42102
8071414	TMEM191A	6.03988	5.61891	-0.42097
7993341	BFAR	9.44077	9.01991	-0.42086
8033899	EIF3G	10.343	9.92216	-0.42084
7898355	NA	3.17646	2.75563	-0.42083
8076749	C22orf40	6.96406	6.54326	-0.4208
7899343	GPR3	8.5045	8.08372	-0.42078
8018324	GGA3	7.98035	7.55972	-0.42063
7924733	PARP1	9.73355	9.31296	-0.42059
8158009	SLC2A8	8.01095	7.59041	-0.42054
7976336	UBR7	6.98655	6.56604	-0.42051
8083941	ECT2	9.52296	9.10248	-0.42048
7987960	TTBK2	5.92935	5.50889	-0.42046
8015460	ACLY	10.7638	10.3434	-0.4204
7956639	TSFM	8.83365	8.41331	-0.42034
7987114	GOLGA8IP	6.02302	5.60279	-0.42023
8176026	FLNA	9.01932	8.59915	-0.42017
7948775	C11orf48	7.90786	7.48805	-0.41981
7945204	ST14	7.82268	7.40313	-0.41955
7965480	PGAM1	11.4704	11.051	-0.4194
7906767	FCGR2C	5.0196	4.60022	-0.41938
7981273	CCDC85C	7.35263	6.93326	-0.41937
8004804	PFAS	7.57112	7.15182	-0.4193
8014264	PEX12	6.78385	6.36456	-0.41929
7959777	BRI3BP	7.92538	7.50634	-0.41904
8071155	USP18	5.25124	4.83231	-0.41893
7979999	NA	3.94464	3.52606	-0.41858
8125649	VPS52	8.47482	8.05629	-0.41853
8178917	VPS52	8.47482	8.05629	-0.41853
8086024	YPLR6490	5.84829	5.42989	-0.4184
8083523	GMPS	10.1426	9.72427	-0.41833
8047262	C2orf69	6.93342	6.51525	-0.41817
7906703	NDUFS2	9.53794	9.11981	-0.41813
8153474	TSTA3	7.45767	7.03979	-0.41788
8134091	CLDN12	9.41865	9.00077	-0.41788
8169073	TMSB15B	4.17976	3.76217	-0.41759
8144786	SLC7A2	8.43258	8.01514	-0.41744
8022902	INO80C	6.71888	6.30169	-0.41719
8015575	GHDC	6.1124	5.69529	-0.41711
8080419	GNL3	10.1659	9.74903	-0.41687
8167125	USP11	8.54537	8.12856	-0.41681
8148501	PTP4A3	8.51214	8.09538	-0.41676
7906564	PEA15	8.73364	8.31688	-0.41676
7981988	SNORD116-20	7.23545	6.81869	-0.41676
8116649	TUBB2A	11.4962	11.0796	-0.4166
8116653	TUBB2A	11.4962	11.0796	-0.4166
7924058	IRF6	6.91929	6.50286	-0.41643
7951046	MRE11A	7.56682	7.15055	-0.41627
8120602	OGFRL1	7.76853	7.35249	-0.41604
8102984	NA	7.63812	7.22221	-0.41591
7957551	SOCS2	9.32178	8.9059	-0.41588
7952436	ESAM	6.04218	5.62637	-0.41581
7929130	NA	4.27958	3.86379	-0.41579
8162462	FAM120A	9.77043	9.35472	-0.41571
7921916	RGS5	7.5034	7.08784	-0.41556
7924686	C1orf55	7.5369	7.12147	-0.41543
7950086	NUMA1	7.57701	7.16172	-0.41529
7943577	RAB39	4.10738	3.69223	-0.41515
8145566	NA	3.81943	3.40444	-0.41499
8131475	C1GALT1	8.58068	8.16571	-0.41497
8087254	IMPDH2	10.3923	9.97736	-0.41494
7897441	H6PD	6.23299	5.81818	-0.41481
8122142	SNORD101	5.89899	5.48421	-0.41478
7952185	DPAGT1	9.10164	8.68691	-0.41473
7971150	LHFP	7.53865	7.12403	-0.41462
7898809	EPHB2	9.07648	8.66196	-0.41452
7898939	NIPAL3	6.40138	5.98695	-0.41443
7960529	SCNN1A	9.04979	8.63553	-0.41426
8083901	FNDC3B	9.3737	8.95988	-0.41382
8141625	EPHB4	8.43806	8.02426	-0.4138
8048411	TTLL4	9.22083	8.8072	-0.41363
7985767	AEN	8.09883	7.68546	-0.41337
7946815	PIK3C2A	10.6482	10.2349	-0.4133
7982527	ZNF770	7.18035	6.76764	-0.41271
7937763	MRPL23	9.62425	9.21175	-0.4125
8075130	PITPNB	9.77849	9.36603	-0.41246
8165630	C9orf37	7.81289	7.40057	-0.41232
8041168	SNORD53	6.82508	6.41296	-0.41212
7900395	RLF	7.84588	7.4338	-0.41208
7941127	ZFPL1	8.59982	8.18774	-0.41208
7908694	NAV1	5.55949	5.14758	-0.41191
7925978	C10orf18	8.31178	7.89988	-0.4119
8109484	KIF4B	8.49783	8.08599	-0.41184
7954382	PYROXD1	7.36889	6.95712	-0.41177
7915640	EIF2B3	8.90791	8.4963	-0.41161
8085340	VGLL4	6.87349	6.46204	-0.41145
7996490	TMEM208	8.84658	8.43523	-0.41135
8102389	C4orf21	5.76133	5.35001	-0.41132
7939676	ATG13	8.79807	8.38683	-0.41124
8107823	ADAMTS19	6.27896	5.86775	-0.41121
8002421	VAC14	7.8032	7.39227	-0.41093
8005441	SMCR8	7.01501	6.60409	-0.41092
8171182	PRKX	7.47393	7.06309	-0.41084
7921076	GPATCH4	8.71671	8.30593	-0.41078
8112865	SERINC5	8.91124	8.50059	-0.41065
8129590	STX7	8.70882	8.29817	-0.41065
7923189	KIF14	7.62573	7.21509	-0.41064
8013771	TLCD1	7.6574	7.24728	-0.41012
8043324	RGPD1	8.97811	8.5681	-0.41001
8053622	RGPD1	8.97811	8.5681	-0.41001
8082408	SEC61A1	10.231	9.82111	-0.40989
7955719	HIGD1A	9.37408	8.96422	-0.40986
7948612	FADS1	10.2451	9.83525	-0.40985
8149707	BIN3	5.68944	5.27961	-0.40983
8126394	MRPS10	9.44475	9.03498	-0.40977
8117529	NA	2.89899	2.48941	-0.40958
7970595	C1QTNF9B	5.75357	5.34425	-0.40932
8085431	NUP210	8.57526	8.16594	-0.40932
8145281	SLC25A37	7.516	7.10676	-0.40924
8110265	FGFR4	8.05311	7.64389	-0.40922
7941865	RAD9A	7.30047	6.89141	-0.40906
8175369	MAP7D3	7.08897	6.68004	-0.40893
8145272	R3HCC1	7.63916	7.23038	-0.40878
8007904	GOSR2	8.61943	8.2108	-0.40863
7936115	SH3PXD2A	6.86625	6.45763	-0.40862
8009929	LOC643008	4.95928	4.55066	-0.40862
8082350	MCM2	8.40809	7.99956	-0.40853
8070961	LSS	8.2893	7.88092	-0.40838
8066214	TGM2	7.90395	7.49561	-0.40834
8036656	SARS2	7.60479	7.19653	-0.40826
8119993	HSP90AB1	12.0077	11.5995	-0.4082
8140579	CACNA2D1	6.30159	5.8934	-0.40819
7941104	ARL2	10.3474	9.93937	-0.40803
8068938	RRP1	7.82025	7.41226	-0.40799
8086451	HIGD1A	9.80639	9.39849	-0.4079
7941214	POLA2	8.96052	8.55278	-0.40774
8045334	NA	3.66023	3.25272	-0.40751
7942489	DNAJB13	3.94554	3.53807	-0.40747
7939424	API5	9.95269	9.54526	-0.40743
8154563	ACER2	5.91167	5.50425	-0.40742
8003576	TUBB4Q	4.11051	3.70362	-0.40689
8009517	SOX9	7.82703	7.42031	-0.40672
7973067	PNP	8.52007	8.11339	-0.40668
8150830	LYPLA1	8.6261	8.21945	-0.40665
7952830	NCAPD3	7.65523	7.2486	-0.40663
7996137	KATNB1	6.65928	6.25272	-0.40656
7972546	NA	5.03345	4.62693	-0.40652
7947991	NUP160	8.72916	8.32268	-0.40648
7940698	TAF6L	6.56248	6.15605	-0.40643
7958275	POLR3B	8.02268	7.61652	-0.40616
8072170	KREMEN1	7.40317	6.99706	-0.40611
7987365	NANOG	6.10208	5.69611	-0.40597
7945579	CHID1	9.84626	9.44031	-0.40595
8173615	RLIM	7.99019	7.58445	-0.40574
7968236	RASL11A	8.87136	8.46601	-0.40535
7914184	PTAFR	7.5545	7.1492	-0.4053
8019954	FLJ35776	7.9811	7.57592	-0.40518
7901357	NA	6.80572	6.40082	-0.4049
8013222	TOP3A	7.00425	6.59947	-0.40478
8009227	PSMC5	11.1601	10.7556	-0.4045
8126629	GTPBP2	6.77564	6.37116	-0.40448
8121510	RPF2	8.83694	8.43254	-0.4044
8026272	IL27RA	6.12104	5.7167	-0.40434
8027884	NA	10.0958	9.69159	-0.40421
8097356	PLK4	7.56598	7.16199	-0.40399
7946957	SAAL1	9.25891	8.85496	-0.40395
7918813	NRAS	10.862	10.4582	-0.4038
8066921	KCNB1	4.86018	4.45652	-0.40366
7946478	DENND5A	8.34594	7.94248	-0.40346
8076481	CYB5R3	10.8436	10.4403	-0.4033
8006479	LIG3	9.02559	8.62243	-0.40316
8009761	NUP85	9.14645	8.74333	-0.40312
8116835	GCNT2	5.36042	4.95743	-0.40299
8051275	CAPN13	5.55388	5.15129	-0.40259
8063583	RBM38	7.77799	7.37556	-0.40243
7980605	KCNK10	6.04807	5.64568	-0.40239
8143040	SLC35B4	7.5503	7.14795	-0.40235
8111153	MYO10	8.30148	7.89938	-0.4021
7915207	PABPC4	10.5269	10.1248	-0.4021
8074853	ZNF280A	5.17306	4.77101	-0.40205
7915101	INPP5B	7.46302	7.06115	-0.40187
7942315	LRTOMT	6.63954	6.23782	-0.40172
8122426	PHACTR2	8.22553	7.82383	-0.4017
7961293	TAS2R46	2.87868	2.47707	-0.40161
8021768	TSHZ1	6.1007	5.69936	-0.40134
8033025	DUS3L	6.97215	6.57084	-0.40131
8109141	GRPEL2	8.46449	8.06335	-0.40114
8002270	NA	5.4959	5.09496	-0.40094
8007043	RAPGEFL1	6.29182	5.89104	-0.40078
8060257	STK25	9.12425	8.72368	-0.40057
8076393	CENPM	8.29106	7.89054	-0.40052
8158998	SNORD36C	6.89595	6.49555	-0.4004
8013191	FLII	9.07932	8.67913	-0.40019
7992685	KCTD5	6.78714	6.38701	-0.40013
8103853	MGC45800	6.58965	6.18957	-0.40008
7899273	NUDC	10.9839	10.584	-0.3999
7985752	NCRNA00052	3.50391	3.10428	-0.39963
8064978	JAG1	9.49067	9.09112	-0.39955
7985039	NA	4.89668	4.49722	-0.39946
7901720	PRKAA2	8.59582	8.19636	-0.39946
8118535	RNF5	7.48478	7.08556	-0.39922
8179472	RNF5	7.48478	7.08556	-0.39922
7943552	AASDHPPT	7.72475	7.32573	-0.39902
8001552	CIAPIN1	7.62757	7.22862	-0.39895
8095574	DCK	7.50644	7.10759	-0.39885
8159873	NA	6.35581	5.95737	-0.39844
8022506	NA	5.30331	4.90503	-0.39828
8031748	ZNF749	4.99725	4.59904	-0.39821
7973974	PAX9	7.0851	6.68744	-0.39766
7948192	SSRP1	10.8358	10.4384	-0.3974
7955606	C12orf44	8.67959	8.28232	-0.39727
7997940	SNORD68	4.81531	4.41808	-0.39723
8059532	C2orf83	5.84079	5.4436	-0.39719
8168391	NCRNA00246B	5.65623	5.25905	-0.39718
7957540	MRPL42	9.56867	9.1715	-0.39717
8003357	FAM38A	7.09766	6.70052	-0.39714
8134599	CPSF4	8.88287	8.48586	-0.39701
7938756	ST13P5	8.69855	8.30155	-0.397
7951535	KDELC2	7.96708	7.57013	-0.39695
8143341	JHDM1D	7.67114	7.2742	-0.39694
8162438	BICD2	6.80081	6.40396	-0.39685
7907183	SCYL3	7.45169	7.05491	-0.39678
8052798	AAK1	7.70127	7.30451	-0.39676
8016245	LRRC37A4	7.49057	7.09381	-0.39676
7928705	TSPAN14	9.15305	8.75645	-0.3966
8001666	CSNK2A2	10.0943	9.69781	-0.39649
7972021	TBC1D4	7.32151	6.92505	-0.39646
8125766	BAK1	8.59681	8.20049	-0.39632
8008609	ANKFN1	3.37725	2.98094	-0.39631
7929947	TLX1	6.14287	5.74664	-0.39623
7993946	EEF2K	7.4314	7.03523	-0.39617
8054614	ANAPC1	9.10746	8.71138	-0.39608
8093578	NAT8L	6.48009	6.08404	-0.39605
8147172	CPNE3	9.28332	8.88744	-0.39588
8008132	ATP5G1	11.1237	10.7279	-0.3958
8035156	CHERP	9.17963	8.78386	-0.39577
8115871	FLJ16171	5.28741	4.89166	-0.39575
7946292	CYB5R2	6.75232	6.35661	-0.39571
8042811	TET3	6.10076	5.70525	-0.39551
7925500	CHML	7.11855	6.72309	-0.39546
7921583	COPA	9.99816	9.60297	-0.39519
8165866	STS	7.69892	7.30374	-0.39518
8116929	RPL15	11.6505	11.2554	-0.3951
7955063	TMEM106C	10.523	10.128	-0.395
8158431	PHYHD1	8.95811	8.56328	-0.39483
8067185	BMP7	8.12296	7.72816	-0.3948
8120860	BCKDHB	7.74127	7.34658	-0.39469
8043602	NCAPH	8.8415	8.44691	-0.39459
8079563	DHX30	8.02934	7.63501	-0.39433
8026698	C19orf62	9.59177	9.19762	-0.39415
8065018	TASP1	7.05962	6.66549	-0.39413
8004867	NDEL1	8.48757	8.09358	-0.39399
8004521	MPDU1	9.50607	9.11214	-0.39393
7903765	GSTM1	9.4549	9.06103	-0.39387
8010924	VPS53	8.23685	7.84301	-0.39384
8002762	RFWD3	7.87769	7.48385	-0.39384
8106689	CKMT2	6.74831	6.35453	-0.39378
8007561	G6PC3	9.65672	9.26296	-0.39376
8158771	AIF1L	9.1467	8.75294	-0.39376
8107868	CDC42SE2	8.54797	8.1543	-0.39367
8126095	C6orf129	10.0387	9.64508	-0.39362
8167234	RBM3	7.82677	7.43323	-0.39354
7911730	PANK4	7.73992	7.34646	-0.39346
8115895	KIAA1191	9.76408	9.37067	-0.39341
8013500	TMEM11	8.47074	8.07734	-0.3934
7934255	CBARA1	8.38947	7.99608	-0.39339
8147994	UTP23	7.37207	6.97907	-0.393
8173729	PGAM4	11.1618	10.7691	-0.3927
8176282	PGAM4	11.1618	10.7691	-0.3927
8090343	KLF15	6.44422	6.0516	-0.39262
7962013	ERGIC2	8.66413	8.27169	-0.39244
8000263	COG7	7.30379	6.91165	-0.39214
8091648	SSR3	10.0959	9.7038	-0.3921
8083221	PBX2	10.0946	9.70264	-0.39196
7939738	DDB2	9.99459	9.60266	-0.39193
7945786	NAP1L4	9.95276	9.56084	-0.39192
8164883	SURF4	10.0819	9.69004	-0.39186
7981992	SNORD116-22	3.0214	2.62961	-0.39179
8013588	POLDIP2	10.0342	9.64242	-0.39178
8081115	ARL13B	7.46774	7.07596	-0.39178
8027692	ZNF30	6.15124	5.75946	-0.39178
7922637	TOR1AIP2	9.06009	8.66833	-0.39176
8073775	FBLN1	8.55901	8.16739	-0.39162
7958152	PGAM1	11.3121	10.9205	-0.3916
7916393	CYB5RL	6.09363	5.70208	-0.39155
8024204	STK11	7.12635	6.73481	-0.39154
8103437	PPID	9.99991	9.60843	-0.39148
7990487	SIN3A	8.76887	8.37745	-0.39142
8165610	WDR85	6.41776	6.02637	-0.39139
8013431	AKAP10	7.11965	6.72828	-0.39137
8115099	PDGFRB	6.116	5.72469	-0.39131
8116096	DDX41	8.28399	7.89271	-0.39128
7955055	SLC48A1	8.31337	7.92215	-0.39122
7944931	SLC37A2	5.99795	5.60673	-0.39122
8160389	IFNA10	3.41809	3.02723	-0.39086
8094070	C4orf23	6.14868	5.75795	-0.39073
8175193	NA	2.66067	2.26996	-0.39071
8027604	KIAA0355	7.60939	7.21923	-0.39016
8009094	LOC342541	6.64197	6.25185	-0.39012
8037467	ZNF229	6.47628	6.08616	-0.39012
8150112	GSR	9.79435	9.40457	-0.38978
7909175	SRGAP2	7.72265	7.33289	-0.38976
8068974	TRAPPC10	7.23165	6.84192	-0.38973
7941478	SART1	7.74798	7.35833	-0.38965
8068520	NA	3.01272	2.62326	-0.38946
8032455	PLEKHJ1	8.37038	7.98093	-0.38945
7956026	GDF11	7.115	6.72557	-0.38943
8177704	OR10C1	4.33822	3.94887	-0.38935
8179007	OR10C1	4.33822	3.94887	-0.38935
7990700	WDR61	8.30305	7.91385	-0.3892
7899737	EIF3I	11.6284	11.2392	-0.3892
7932186	DCLRE1C	5.43043	5.0413	-0.38913
7965200	CCDC59	10.5085	10.1195	-0.389
8152628	DERL1	8.43068	8.04173	-0.38895
8033162	KHSRP	7.94142	7.55261	-0.38881
8072015	ADRBK2	7.20741	6.81868	-0.38873
8101429	PLAC8	6.08792	5.69934	-0.38858
8050503	TTC32	3.97397	3.58551	-0.38846
8105647	C5orf44	7.45978	7.07138	-0.3884
8153411	ZC3H3	6.85297	6.46478	-0.38819
7965918	NT5DC3	5.9459	5.55778	-0.38812
7959205	MLEC	10.344	9.9559	-0.3881
8025697	ILF3	9.85273	9.46466	-0.38807
8179238	MICA	4.67869	4.29093	-0.38776
8038477	AKT1S1	7.15251	6.76481	-0.3877
8073072	APOBEC3D	6.85672	6.46903	-0.38769
8143054	AKR1B1	9.35975	8.97208	-0.38767
8061324	XRN2	10.0198	9.63231	-0.38749
8101359	C4orf11	3.9198	3.53235	-0.38745
8057742	NA	3.95552	3.56817	-0.38735
7996252	NA	3.70287	3.31563	-0.38724
7966202	KCTD10	8.46828	8.08106	-0.38722
7897648	PEX14	8.30682	7.91982	-0.387
8016708	LRRC59	10.4244	10.0375	-0.3869
8021442	ZNF532	7.36309	6.97624	-0.38685
8162624	C9orf21	7.0384	6.65162	-0.38678
8021418	MALT1	6.8873	6.50061	-0.38669
8128737	MICAL1	5.7839	5.39732	-0.38658
8032491	LMNB2	9.08052	8.69395	-0.38657
8167305	EBP	11.2472	10.8607	-0.3865
8007992	KPNB1	10.4558	10.0694	-0.3864
8096704	NPNT	7.17718	6.79092	-0.38626
8128383	COQ3	6.84204	6.45591	-0.38613
8048014	RPE	8.74715	8.36104	-0.38611
7963009	RHEBL1	4.76473	4.37873	-0.386
7929624	PGAM1	11.2837	10.8979	-0.3858
7984871	CSK	7.52635	7.14099	-0.38536
8152333	NA	7.00002	6.61468	-0.38534
7925031	FLJ30430	3.7145	3.32934	-0.38516
7920594	PYGO2	7.01536	6.63021	-0.38515
8061919	CBFA2T2	7.0592	6.67409	-0.38511
7937474	NS3BP	5.77945	5.39438	-0.38507
8112331	ISCA1	9.46909	9.08413	-0.38496
8112570	MRPS27	8.43623	8.05133	-0.3849
8080093	RBM15B	5.96135	5.57659	-0.38476
8092230	ZMAT3	8.02884	7.6442	-0.38464
8001507	BBS2	7.33225	6.94787	-0.38438
8136614	AGK	8.68407	8.29977	-0.3843
8082605	NA	4.69098	4.30669	-0.38429
7956747	NA	4.57196	4.18771	-0.38425
7926677	OTUD1	6.50046	6.11622	-0.38424
7956152	PA2G4	11.952	11.5679	-0.3841
8040927	NRBP1	10.9987	10.6146	-0.3841
7906602	VANGL2	6.28494	5.90087	-0.38407
7910138	NA	3.41821	3.03427	-0.38394
8123507	TBP	9.32847	8.94463	-0.38384
7962760	SENP1	9.24335	8.85952	-0.38383
7983867	CGNL1	7.28234	6.89861	-0.38373
7899350	FAM76A	5.85275	5.46909	-0.38366
8172670	DGKK	8.99068	8.60705	-0.38363
7994756	PPP4C	8.94944	8.56583	-0.38361
8095360	NA	6.57712	6.19356	-0.38356
8178188	RNF5P1	7.50104	7.1175	-0.38354
8062852	PKIG	7.48184	7.0984	-0.38344
8083092	ZBTB38	8.64292	8.25975	-0.38317
7994265	NA	3.87557	3.4924	-0.38317
8017505	GH1	4.43528	4.05216	-0.38312
8039054	ZNF347	6.2118	5.82869	-0.38311
8077042	SBF1	6.76234	6.37926	-0.38308
[truncated: 26,537 more rows]
