# Supplementary material for: A kinome siRNA screen identifies HGS as a potential target for liver cancers with oncogenic mutations in CTNNB1
Source: BMC Cancer. 2015 Dec 29;15:1020. doi: 10.1186/s12885-015-2037-8 (PMC4696130; doi:10.1186/s12885-015-2037-8)
Supplement: Additional file 8: Figure S6. — HCT116WT/S45del and HCT116WT/- cell growth in response to knockdown of potential lethal synthetic hits HGS; STRADA, FES, BRAF and PKMYT1. HCT116WT/S45del and HCT116WT/- cells were transfected with scramble siRNA or with siRNAs specifically designed to target HGS, STRADA, FES, BRAF or PKMYT1. Untransfected cells were also included as a control. Cell density was estimated 72 h after cell transfection by crystal violet staining, and the effect of siRNA on cell proliferation was determined by the ratio ‘O.D. target siRNA’/ ‘O.D. scramble siRNA’. Gray and black rows show the proliferation rate of HCT116WT/S45del and HCT116WT/- cells (relative to scamble), respectively. Note that cell proliferation was affected by the silencing of each genes, both in HCT116WT/S45del and HCT116WT/- cells, except for HGS, the depletion of which affected specifically HCT116WT/S45del cells. (PDF 92 kb) [file 12885_2015_2037_MOESM8_ESM.pdf]

## Sheet: Feuil1
Kinome - Qiagen - Gene list	Primary RNAi screen results: genes required for parental HuH6 survival
ABL2	YES
ADK	YES
ADRBK1	YES
AK1	YES
AURKB	YES
BRAF	YES
CDK3	YES
CDK4	YES
CDK5	YES
CDK5R2	YES
CDK7	YES
CDKL1	YES
CHKB	YES
CSNK2A2	YES
DDR1	YES
DYRK1B	YES
EPHB2	YES
ERN2	YES
FES	YES
GRK1	YES
HGS	YES
LIMK1	YES
LTK	YES
LYK5 (STRADA)	YES
MAP2K1	YES
MAP3K7IP1	YES
MAPK13	YES
MAPK14	YES
MVK	YES
NEK4	YES
NEK8	YES
NME3	YES
PAK6	YES
PFKP	YES
PI4K2A	YES
PIK3R4	YES
PKMYT1	YES
PKN1	YES
PLK3	YES
PRKACG	YES
PRPS1L1	YES
PSKH1	YES
RPS6KA2	YES
RYK	YES
SBK2	YES
SPHK2	YES
STK16	YES
TGFBR2	YES
TNK2	YES
TSKS	YES
UCKL1	YES
WNK4	YES
AAK1
AATK
ABL1
ACVR1
ACVR1B
ACVR2A
ACVR2B
ACVRL1
ADCK1
ADCK2
ADCK4
ADCK5
ADRBK2
AK2
AK3
AK3L1
AK5
AK7
AKAP1
AKAP10
AKAP11
AKAP12
AKAP13
AKAP14
AKAP3
AKAP4
AKAP5
AKAP6
AKAP7
AKAP8
AKAP8L
AKAP9
AKT1
AKT2
AKT3
ALK
ALPK1
ALPK2
ALS2CR2
ANKK1
ARAF
ARHGAP26
ATM
ATR
AURKA
AURKAIP1
AURKC
AXL
BAIAP2L1
BCKDK
BCR
BEGAIN
BLK
BMP2K
BMPR1A
BMPR1B
BMPR2
BMX
BRSK1
BRSK2
BTK
BUB1
BUB1B
C17orf75
CALM1
CALM2
CALM3
CAMK1
CAMK1D
CAMK1G
CAMK2A
CAMK2B
CAMK2D
CAMK2G
CAMK2N1
CAMK4
CAMKK1
CAMKK2
CASK
CCRK
CDC2
CDC2L1
CDC2L5
CDC2L6
CDC42BPA
CDC42BPB
CDC42BPG
CDC42SE2
CDK10
CDK2
CDK5R1
CDK6
CDK8
CDK9
CDKL2
CDKL3
CDKL4
CDKL5
CDKN1A
CDKN1B
CDKN1C
CDKN2A
CDKN2B
CDKN2C
CDKN2D
CERK
CHEK1
CHEK2
CHKA
CHUK
CIB2
CIB3
CINP
CIT
CKB
CKM
CKMT1B
CKMT2
CKS1B
CKS2
CLK1
CLK2
CLK2P
CLK3
CLK4
CMPK1
CNKSR1
CNKSR3
CRKRS
CSK
CSNK1A1
CSNK1A1L
CSNK1A1P1
CSNK1D
CSNK1E
CSNK1G1
CSNK1G2
CSNK1G3
CSNK2A1
CSNK2B
DAPK1
DAPK2
DAPK3
DBF4
DCK
DCLK1
DCLK2
DDR2
DGKA
DGKB
DGKD
DGKE
DGKG
DGKH
DGKI
DGKQ
DGKZ
DGUOK
DMPK
DOK1
DTYMK
DYRK1A
DYRK2
DYRK3
DYRK4
EEF2K
EGFR
EIF2AK1
EIF2AK2
EIF2AK3
EIF2AK4
EPHA1
EPHA2
EPHA3
EPHA4
EPHA5
EPHA7
EPHA8
EPHB1
EPHB3
EPHB4
EPHB6
EPS8L1
ERBB2
ERBB3
ERBB4
ERN1
ETNK1
ETNK2
FASTK
FER
FGFR1
FGFR2
FGFR3
FGFR4
FGGY
FGR
FLT1
FLT3
FLT3LG
FLT4
FN3K
FN3KRP
FRK
FUK
FYN
GAK
GALK1
GALK2
GCK
GIT1
GIT2
GK
GK2
GK5
GKAP1
GNE
GRK4
GRK5
GRK6
GRK7
GSK3A
GSK3B
GUK1
HCK
HIPK1
HIPK2
HIPK3
HIPK4
HK1
HK2
HK3
HSPB8
HUNK
IBTK
ICK
IHPK1
IHPK2
IHPK3
IKBKAP
IKBKB
IKBKE
IKBKG
ILK
IRAK1
IRAK1BP1
IRAK2
IRAK3
IRAK4
ITK
ITPK1
ITPKA
ITPKB
ITPKC
JAK1
JAK2
JAK3
KALRN
KDR
KHK
KIAA1804
KIDINS220
KIT
KSR1
KSR2
LATS1
LATS2
LCK
LIMK2
LMTK2
LMTK3
LOC100133042
LOC390975
LOC391533
LOC400301
LOC646096
LOC729334
LRRK1
LRRK2
LYN
MADD
MAGI3
MAK
MAP2K1IP1
MAP2K2
MAP2K3
MAP2K4
MAP2K5
MAP2K6
MAP2K7
MAP3K1
MAP3K10
MAP3K11
MAP3K12
MAP3K13
MAP3K14
MAP3K2
MAP3K3
MAP3K4
MAP3K5
MAP3K6
MAP3K7
MAP3K7IP2
MAP3K8
MAP3K9
MAP4K1
MAP4K2
MAP4K3
MAP4K4
MAP4K5
MAPK1
MAPK10
MAPK11
MAPK12
MAPK15
MAPK3
MAPK4
MAPK6
MAPK7
MAPK8
MAPK8IP1
MAPK8IP2
MAPK8IP3
MAPK9
MAPKAP1
MAPKAPK2
MAPKAPK3
MAPKAPK5
MAPKBP1
MARCKS
MARK1
MARK2
MARK3
MARK4
MAST2
MAST3
MAST4
MASTL
MATK
MELK
MERTK
MET
MINK1
MKNK1
MKNK2
MOS
MST1R
MUSK
MYLK
MYLK2
MYLK3
NADK
NAGK
NEK1
NEK11
NEK2
NEK3
NEK5
NEK6
NEK7
NEK9
NLK
NME1
NME2
NME4
NME5
NME6
NME7
NRBP1
NRGN
NRK
NTRK1
NTRK2
NTRK3
NUAK1
NUAK2
NUCKS1
OXSR1
PACSIN1
PACSIN2
PACSIN3
PAK1
PAK2
PAK3
PAK4
PAK7
PANK1
PANK2
PANK3
PANK4
PASK
PBK
PCK1
PCTK1
PCTK2
PCTK3
PDGFRA
PDGFRB
PDIK1L
PDK1
PDK2
PDK3
PDK4
PDLIM5
PDPK1
PDXK
PFKFB1
PFKFB2
PFKFB3
PFKFB4
PFKL
PFKM
PFTK1
PFTK2
PGK1
PGK2
PHKA1
PHKA2
PHKB
PHKG1
PHKG2
PI4K2B
PI4KA
PI4KB
PICK1
PIK3AP1
PIK3C2A
PIK3C2B
PIK3C2G
PIK3C3
PIK3CA
PIK3CB
PIK3CD
PIK3CG
PIK3R1
PIK3R2
PIK3R3
PIK3R5
PIM1
PIM2
PINK1
PIP4K2A
PIP4K2B
PIP4K2C
PIP5K1A
PIP5K1B
PIP5K1C
PIP5K3
PKIA
PKIB
PKIG
PKLR
PKM2
PKN2
PKN3
PLAU
PLK1
PLK2
PLK4
PMVK
PNCK
PRKAA1
PRKAA2
PRKAB1
PRKAB2
PRKACA
PRKACB
PRKAG1
PRKAG2
PRKAG3
PRKAR1A
PRKAR1B
PRKAR2A
PRKAR2B
PRKCA
PRKCB1
PRKCD
PRKCDBP
PRKCE
PRKCG
PRKCH
PRKCI
PRKCQ
PRKCZ
PRKD1
PRKD2
PRKD3
PRKDC
PRKG1
PRKG2
PRKRA
PRKRIR
PRKX
PRKY
PRPF4B
PRSS7
PSKH2
PTK2
PTK2B
PTK6
PTK7
PXK
RAF1
RAGE
RBKS
RET
RFK
RIOK1
RIOK2
RIOK3
RIPK1
RIPK2
RIPK3
RIPK4
RIPK5
ROCK1
ROCK2
ROR1
ROR2
ROS1
RP6-213H19.1
RPS6KA1
RPS6KA3
RPS6KA4
RPS6KA5
RPS6KA6
RPS6KB1
RPS6KB2
RPS6KC1
RPS6KL1
SBK1
SGK1
SGK110
SGK2
SGK3
SH3KBP1
SHARPIN
SHPK
SIK2
SKP1
SKP2
SLK
SMG1
SNF1LK
SNRK
SORCS3
SPEG
SPHK1
SPHKAP
SPRYD3
SRC
SRMS
SRPK1
SRPK2
SRPK3
STK10
STK11
STK11IP
STK17A
STK17B
STK19
STK24
STK25
STK3
STK31
STK32A
STK32B
STK32C
STK33
STK35
STK36
STK38
STK38L
STK39
STK4
STK40
STYK1
SYK
TAOK1
TAOK2
TAOK3
TBK1
TEC
TEK
TESK1
TESK2
TGFBR1
TIE1
TK1
TK2
TLK1
TLK2
TNIK
TNK1
TNNI3K
TP53RK
TPD52L3
TPK1
TRAF3IP3
TRIO
TSSK1B
TSSK2
TSSK3
TSSK6
TTBK1
TTBK2
TTK
TWF1
TWF2
TXK
TYK2
TYRO3
TYROBP
UCK1
UCK2
UGP2
UHMK1
ULK1
ULK2
ULK3
ULK4
VRK1
VRK2
VRK3
WDSUB1
WEE1
WNK1
WNK2
WNK3
XYLB
YES1
ZAK
ZAP70
ZC3HC1
ZMYND8
