# Supplementary material for: A kinome siRNA screen identifies HGS as a potential target for liver cancers with oncogenic mutations in CTNNB1
Source: Springer Nature journal article supplement (doi:10.1186/s12885-015-2037-8), 2015-12-01
Supplement: MOESM5 [file 9745858]

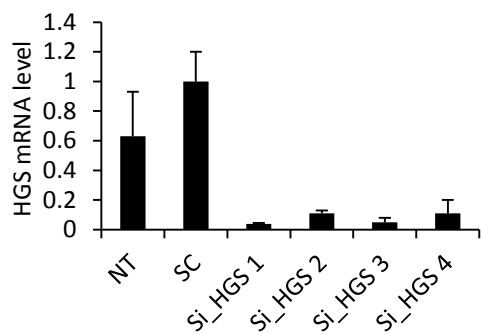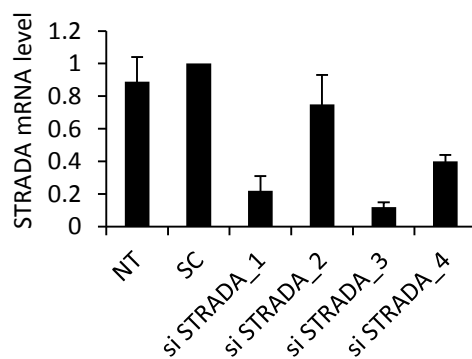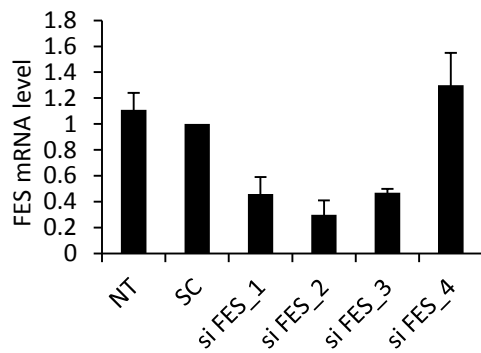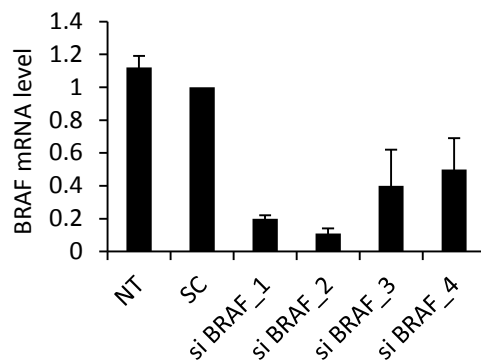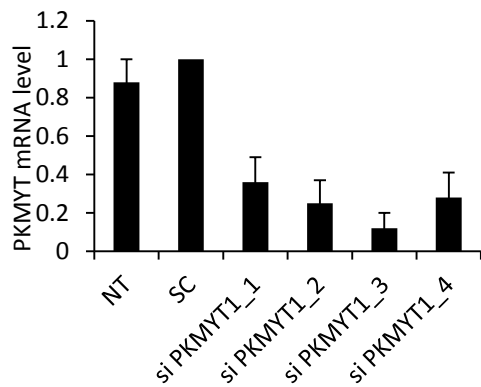

Figure S5
